# Supplementary material for: Activated STAT5 Confers Resistance to Intestinal Injury by Increasing Intestinal Stem Cell Proliferation and Regeneration
Source: PubMed Central journal article supplement — Stem Cell Reports. 2015 Jan 8;4(2):209–25. doi: 10.1016/j.stemcr.2014.12.004 (PMC4325270; doi:10.1016/j.stemcr.2014.12.004), 2015-01-08
Supplement: mmc2.pdf [file mmc2.pdf]

## Activated STAT5 Confers Resistance to Intestinal Injury by Increasing Intestinal Stem Cell Proliferation and Regeneration

Shila Gilbert,<sup>1,8</sup> Harini Nivarthi,<sup>6,8</sup> Christopher N. Mayhew,<sup>2,8</sup> Yuan-Hung Lo,<sup>1</sup> Taeko K. Noah,<sup>1</sup> Jefferson Vallance,<sup>1</sup> Thomas Rüllicke,<sup>6,7</sup> Mathias Müller,<sup>6,7</sup> Anil G. Jegga,<sup>3</sup> Wenjuan Tang,<sup>1</sup> Dongsheng Zhang,<sup>1</sup> Michael Helmrath,<sup>4</sup> Noah Shroyer,<sup>1,2</sup> Richard Moriggl,<sup>5,6,7</sup> and Xiaonan Han<sup>1,\*</sup>

<sup>1</sup>Division of Gastroenterology, Hepatology and Nutrition

<sup>2</sup>Division of Developmental Biology

<sup>3</sup>Division of Biomedical Informatics

<sup>4</sup>Division of Pediatric Surgery

Cincinnati Children's Hospital Medical Center, Cincinnati, OH 45229, USA

<sup>5</sup>Ludwig Boltzmann Institute for Cancer Research, 1090 Vienna, Austria

<sup>6</sup>Institute of Animal Breeding and Genetics, Biomodels Austria, Institute of Laboratory Animal Science, University of Veterinary Medicine, 1210 Vienna, Austria

<sup>7</sup>Medical University of Vienna, 1090 Vienna, Austria

<sup>8</sup>Co-first author

\*Correspondence: [xiaonan.han@cchmc.org](mailto:xiaonan.han@cchmc.org)

<http://dx.doi.org/10.1016/j.stemcr.2014.12.004>

This is an open access article under the CC BY-NC-ND license (<http://creativecommons.org/licenses/by-nc-nd/3.0/>).

### SUMMARY

Intestinal epithelial stem cells (IESCs) control the intestinal homeostatic response to inflammation and regeneration. The underlying mechanisms are unclear. Cytokine-STAT5 signaling regulates intestinal epithelial homeostasis and responses to injury. We link STAT5 signaling to IESC replenishment upon injury by depletion or activation of *Stat5* transcription factor. We found that depletion of *Stat5* led to deregulation of IESC marker expression and decreased LGR5<sup>+</sup> IESC proliferation. STAT5-deficient mice exhibited worse intestinal histology and impaired crypt regeneration after  $\gamma$ -irradiation. We generated a transgenic mouse model with inducible expression of constitutively active *Stat5*. In contrast to *Stat5* depletion, activation of STAT5 increased IESC proliferation, accelerated crypt regeneration, and conferred resistance to intestinal injury. Furthermore, ectopic activation of STAT5 in mouse or human stem cells promoted LGR5<sup>+</sup> IESC self-renewal. Accordingly, STAT5 promotes IESC proliferation and regeneration to mitigate intestinal inflammation. STAT5 is a functional therapeutic target to improve the IESC regenerative response to gut injury.

### INTRODUCTION

Adult stem cells (SCs) retain the capacity of self-renewal and differentiation to generate multiple differentiated cell types (Barker et al., 2007). Thus, these adult SCs are utilized to functionally regenerate damaged tissues or reverse organ failure (Yui et al., 2012). However, SCs that are deregulated during inflammation, infection, or tissue regeneration may turn into invasive cancer SCs (CSCs) (Beachy et al., 2004). Accordingly, tight spatial-temporal regulation of adult SC behaviors may confer injury resistance, tissue regeneration, or tumor suppression, whereas SC deregulation may cause tumor initiation and/or recurrence (Merlos-Suárez et al., 2011). However, the lack of molecular markers that reflect the fine modulation of SC homeostatic response to injury or regeneration significantly hinders the development of regenerative medicine and cancer therapy.

Intestinal epithelial SCs (IESCs) are roughly categorized as either quiescent or active IESCs based in part on the expression of specific markers, including LGR5, *Olfm4*, *Ascl2*, BMI1, MTERT, and LRIG1 (Barker et al., 2007; Mont-

gomery et al., 2011; Powell et al., 2012; Sangiorgi and Capecchi, 2008). They are believed to dynamically switch from one type to the other in response to inhibitory and stimulatory signals caused by cytokines, hormones, or growth factors (Li and Clevers, 2010). Active IESCs, the majority of which are LGR5<sup>+</sup> crypt base columnar cells (CBCs), maintain intestinal lineage development and self-renewal with rapid cycling (Barker et al., 2007), and are highly sensitive to intestinal injury (Tian et al., 2011). In contrast, slow-cycling IESCs (label-retaining cells [LRCs]), which are present at the “+4 crypt position,” contribute to homeostatic regenerative capacity, particularly during recovery from injury (Takeda et al., 2011). These LRCs express markers such as BMI1, HOPX, LRIG1, and/or DCLK1, and can convert to rapidly cycling IESCs in response to injury (Yan et al., 2012). Signal transduction pathways, including WNT, NOTCH, TGF- $\beta$ /BMP, Hedgehog, nuclear hormone receptor, and JAK-STAT, temporally and spatially regulate IESC homeostasis in cell-based tissue self-renewal and regeneration (Crosnier et al., 2006). Recent studies indicated that IESCs can regulate the intestinal homeostatic response to infection and inflammation (Buczacki et al.,

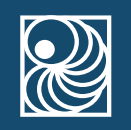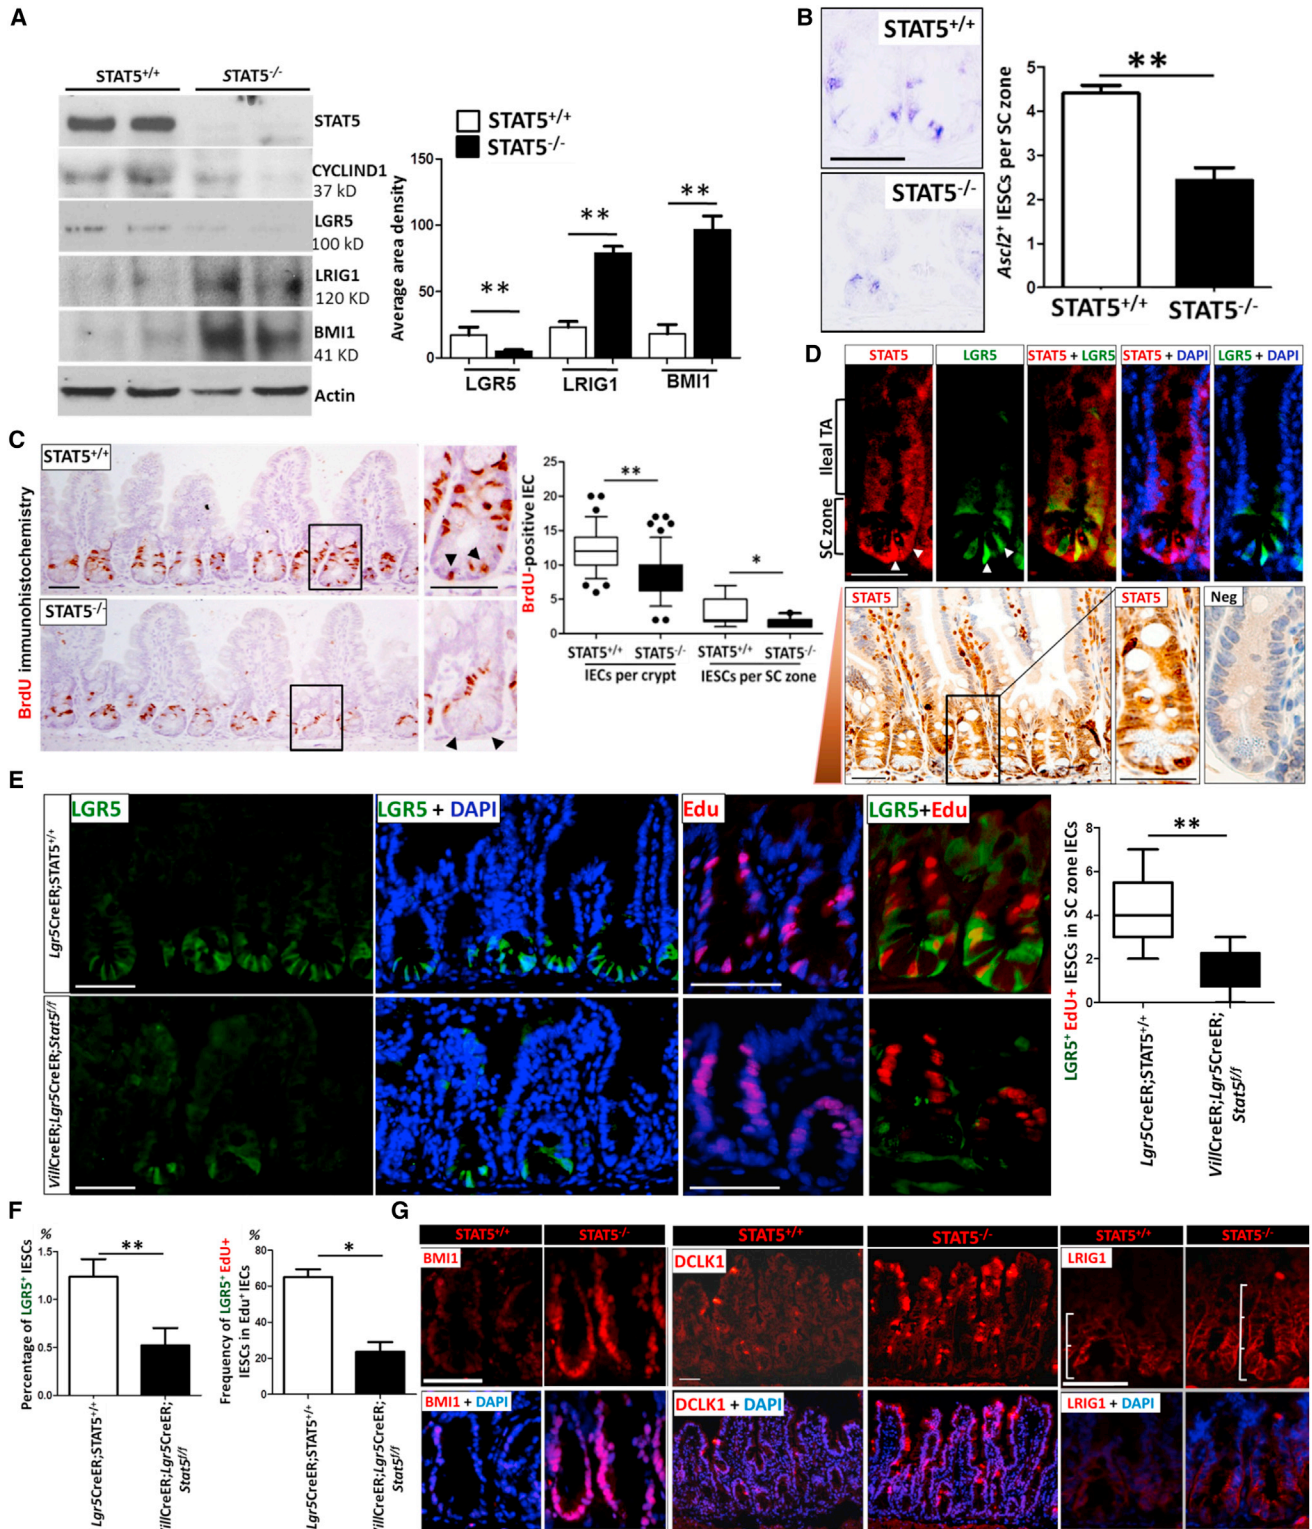

### Figure 1. *Stat5* Depletion Leads to Deregulation of IESC Markers

*STAT5*<sup>-/-</sup> mice were generated using *Villin Cre*-mediated recombination to delete the *Stat5* locus in IECs.

(A) Ileal IECs were isolated from *STAT5*<sup>-/-</sup> and *STAT5*<sup>+/+</sup> mice. *STAT5*, *CYCLIND1*, *LGR5*, *LRIG1*, and *BMI1* proteins were identified by immunoblotting. Signal intensity was determined by densitometry. Results are expressed as mean ± SEM (n = 5 mice per group; \*\*p < 0.01). (legend continued on next page)

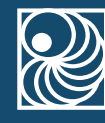

2013). However, the mechanisms underlying this cellular regulation remain largely unknown.

JAK-STAT signaling was recently found to mediate IESC self-renewal and differentiation in response to bacterial infection and tissue impairment in *Drosophila* (Jiang et al., 2009). Compromised JAK-STAT signaling caused loss of IESC quiescence (Buchon et al., 2009), whereas JAK-STAT activation produced extra IESC-like and progenitor cells (Lin et al., 2010). However, the subsequent molecular events by which STAT signaling regulates adult IESCs are poorly defined in mammals. STAT5 activity, as well as its target genes, was predominantly associated with long-term self-renewal and maintenance of hematopoietic (Kato et al., 2005), mammary (Vafaizadeh et al., 2010), and embryonic SC (ESC) phenotypes (Kyba et al., 2003). Temporally controlled STAT5 expression and activation increased mammary SC proliferation, thereby contributing to the functional tissue formation upon chronic inflammatory injury (Vafaizadeh et al., 2010). We previously reported that epithelial STAT5 signaling is required for intestinal epithelial cell (IEC) integrity and homeostatic response to gut injury (Gilbert et al., 2012). Growth hormone (GH) and granulocyte macrophage-colony stimulating factor (GM-CSF) can protect IECs against inflammatory injury through activation of STAT5 (Han et al., 2007, 2010). These findings suggest that STAT5 signaling mediates IEC repopulation through regulation of somatic IESC proliferation or differentiation. Here, utilizing *Stat5*-modified transgenic mouse models and mouse or human SCs, we characterized the role of STAT5 in IESC homeostasis and response to injury, and deciphered the molecular machineries of STAT5 activation in protecting gut injury. Furthermore, our findings suggest that STAT5 activation could be used as a functional marker for IESC intervention of gut injury.

## RESULTS

### Depletion of *Stat5* Leads to Dereglulation of IESC Markers

STAT5 has been demonstrated to govern hematopoietic SC fate and lineage commitment (Kato et al., 2005). Here, we sought to determine whether STAT5 signaling influences adult IESC activity. We previously reported that constitutively IEC STAT5-deficient mice (*VilCre;Stat5<sup>fl/fl</sup>*, hereafter called *STAT5<sup>-/-</sup>*) displayed dampened intestinal barrier regeneration and predisposition to intestinal inflammation (Gilbert et al., 2012). Infection, inflammation, and tumorigenesis occur mainly in the ileum or colon (Boland et al., 2005). Thus, we focused on the effects of STAT5 signaling on ileal and colonic IESCs. We first isolated IECs from *STAT5<sup>-/-</sup>* mice and littermate controls (*Stat5<sup>fl/fl</sup>*, *STAT5<sup>+/+</sup>*) to test the expression and distribution of IESC markers using immunoblotting, in situ hybridization, and immunofluorescence (IF). These analyses indicated that depletion of IEC STAT5 markedly decreased the expression of active IESC markers (*LGR5*, *Ascl2*, and *Olfm4*) (Figures 1A and 1B and Figure S1A available online) with concordant reduction of bromodeoxyuridine (BrdU) incorporation in the ileal crypt IECs (Figure 1C) and CBCs (insets in Figure 1C). To assess the effects of STAT5 signaling on *LGR5<sup>+</sup>* IESCs (Kim et al., 2012), we generated inducible IEC STAT5-deficient mice with an *Lgr5* knockin reporter gene (*Lgr5-eGFP-IRES-CreER<sup>T2</sup>*, hereafter called *Lgr5CreER*; Figure S1B). To investigate STAT5 expression in CBCs, we analyzed intestinal STAT5 and *LGR5* GFP in *Lgr5CreER*; *STAT5<sup>+/+</sup>* mice. *STAT5<sup>+</sup>* IECs were robustly colocalized with *LGR5* at the crypt base in the small and large bowel (Figures 1D, S1C, and S1D). Both IF and immunohistochemistry (IH) staining revealed that STAT5 was distributed in the intestinal crypt and transit-amplifying (TA) zone,

(B) In situ hybridization analysis for *Ascl2* in intestinal crypts. *Ascl2<sup>+</sup>* IESCs were counted in 200 crypts and results are expressed as *Ascl2<sup>+</sup>* IESCs per SC zone (n = 3 mice per group; \*\*p < 0.01).

(C) IEC proliferation was determined by BrdU incorporation as measured by IH. Results are expressed as BrdU<sup>+</sup> IECs per crypt or per SC zone and represented as box-and-whisker plots (black lines: medians; whiskers: 5%–95% percentiles; n ≥ 6 mice per group; \*\*p < 0.01).

(D) Top panel: ileal frozen sections from *LGR5* reporter mice were stained with STAT5 and *LGR5*-GFP double IF. Bottom panel: ileal STAT5 distribution was determined by IH staining. Arrow indicates the STAT5 expression gradient from the crypt to the villus tip. Antibody specificity was confirmed by lack of staining in *STAT5*-deficient intestine (Neg). TA, transit amplifying. Original magnification × 400, n = 3 mice.

(E) *Lgr5-eGFP-IRES-CreER<sup>T2</sup>* (*Lgr5CreER*; *STAT5<sup>+/+</sup>*) and *VillinCreER<sup>T2</sup>-Lgr5-eGFP-IRES-CreER<sup>T2</sup>-Stat5<sup>fl/fl</sup>* (*VilCreER*; *Lgr5CreER*; *Stat5<sup>fl/fl</sup>*) mice were given Tam for 5 days. IF was used to detect GFP and EdU expression in ileal crypts. *LGR5* GFP<sup>+</sup> and EdU<sup>+</sup> IESCs are shown. *LGR5<sup>+</sup>*EdU<sup>+</sup> IESCs in the SC zone were counted and are represented as box-and-whisker plots (black lines: medians; whiskers: 5%–95% percentiles; n = 4 or 6 mice per group; \*\*p < 0.01).

(F) IECs were dissociated and the frequency of *LGR5* GFP<sup>+</sup> and EdU<sup>+</sup> IECs was measured by FACS. Results are expressed as mean ± SEM (n = 6 mice per group; \*p < 0.05, \*\*p < 0.01).

(G) Ileal frozen sections from *STAT5<sup>-/-</sup>* mice were immunostained with anti-BMI1 (red), DCLK1 (red), LRIG1 (red), and DAPI (blue). Scales represent ileal crypt length; n = 5 mice per group.

Scale bars, 50 μm. See also Figure S1.



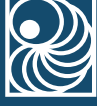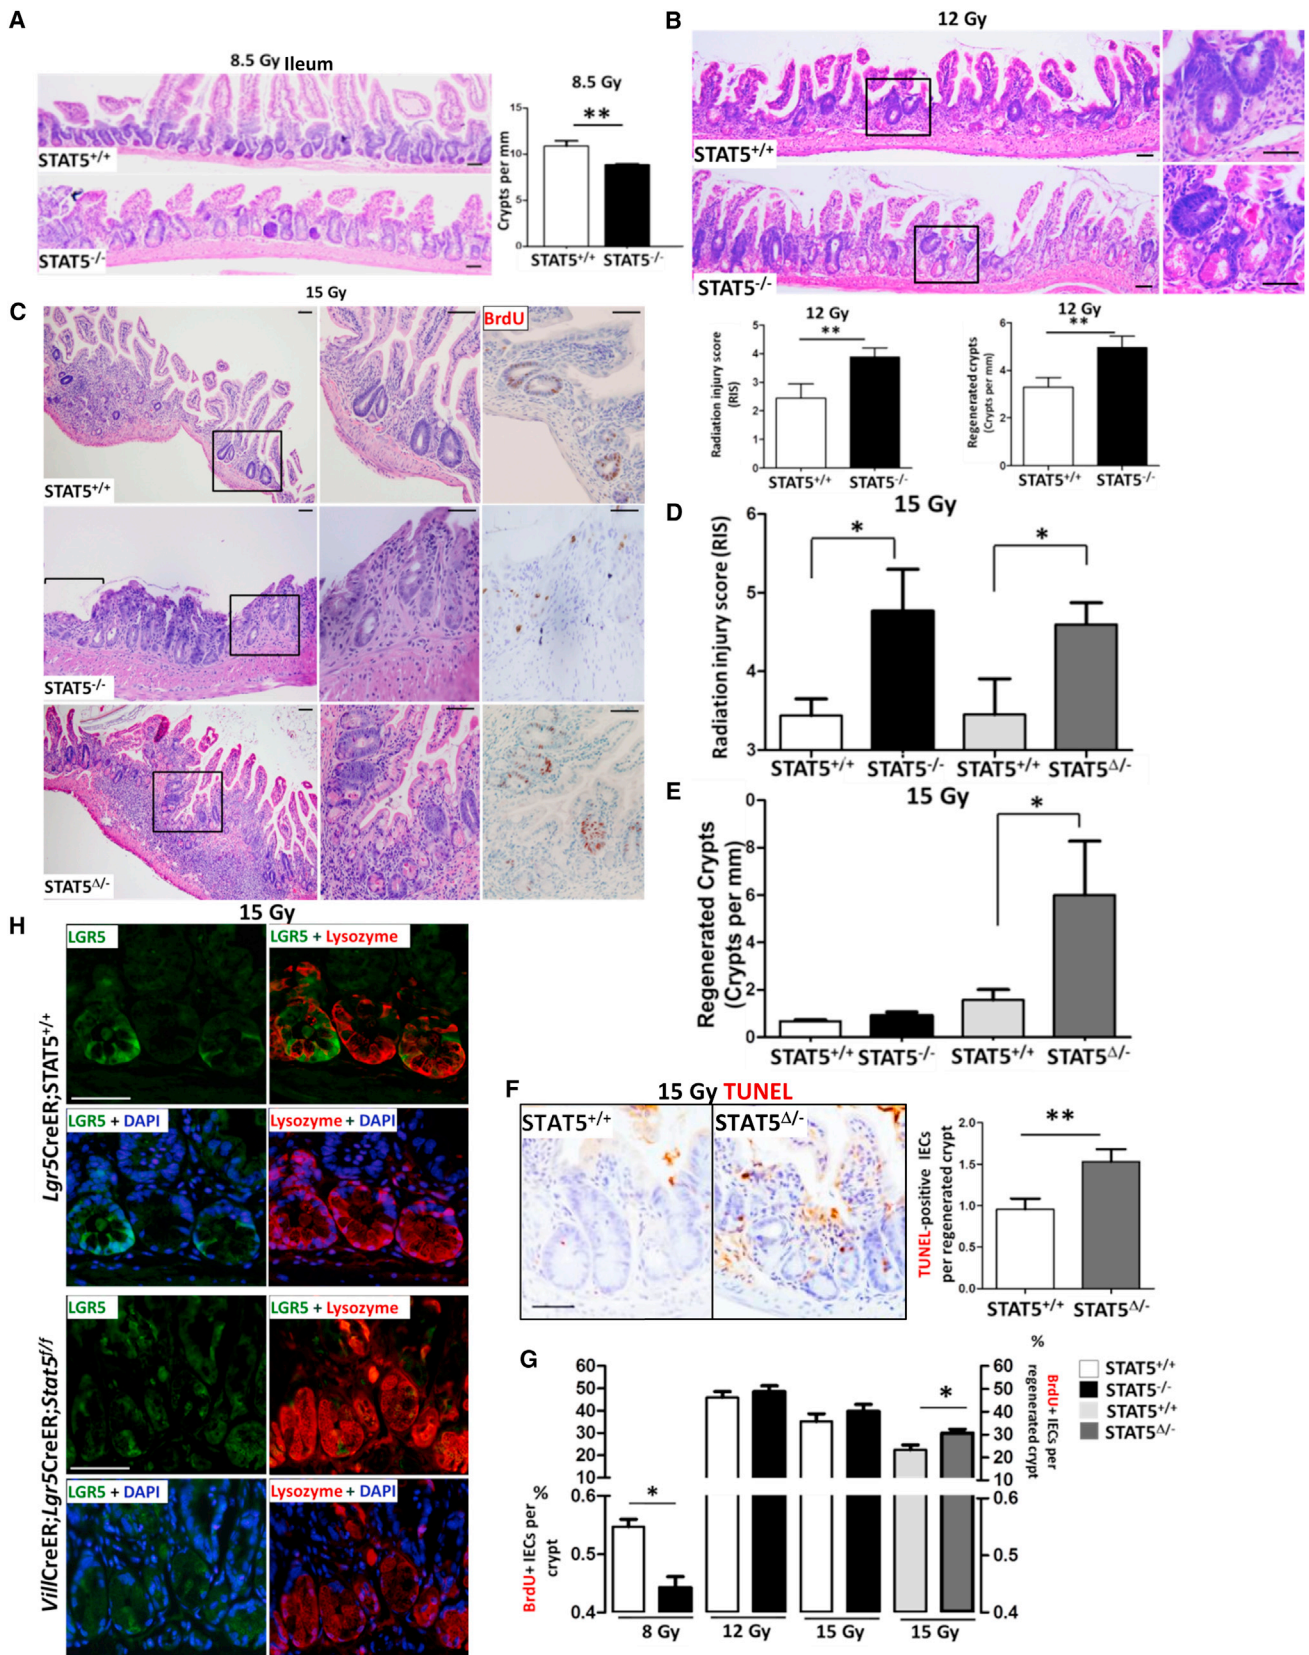

(legend on next page)



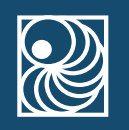

and STAT5 expression displayed a gradient from the crypt to the villus tip (see arrow direction in Figure 1D). These data clearly indicate that both LGR5<sup>+</sup> CBCs and LGR5<sup>-</sup> IESC have strong STAT5 expression, suggesting that STAT5 plays a role in CBCs, other IESC subpopulations, and progenitors. Using LGR5-GFP mice, we found that inducible depletion of IEC STAT5 markedly reduced LGR5<sup>+</sup> IESCs (Figures 1E, 1F, and S1E). Double IF staining and fluorescence-activated cell sorting (FACS) analysis with LGR5-GFP and 5-ethynyl-2'-deoxyuridine (EdU) labeling showed a reduced LGR5<sup>+</sup> IESC proliferation upon STAT5 depletion (Figures 1E, 1F, and S1E). These data were indicative of the requirement of STAT5 signaling for CBC proliferation. Consistently, depletion of *Stat5* led to decreased percentage of EdU<sup>+</sup> TA cells at the upper “+4” position (44.1% ± 5% in *LgrCreER;STAT5<sup>+/+</sup>* mice versus 29% ± 3% in *VilCreER;LgrCreER;Stat5<sup>fl/fl</sup>* mice; *p* = 0.015, *n* ≥ 4 mice per group). In contrast to the reduced CBC and TA cell proliferation, STAT5 deficiency expanded the quiescent IESC pool as measured by IF staining of putative markers of quiescent IESC—BMI1 (Sangiorgi and Capecchi, 2008), LRIG1 (Powell et al., 2012), and DCLK1 (Westphalen et al., 2014; Figure 1G)—and remarkably increased the expression of these quiescent IESC markers (Figures 1A and 1G). Similarly, depletion of colonic IEC STAT5 caused suppression of active IESCs and expansion of quiescent IESC markers (Figures S1F–S1H). Therefore, intestinal *Stat5* depletion is associated with deregulation of IESC markers, suggesting that IEC STAT5 signaling is required for maintenance of adult IESC homeostasis.

### Depletion of *Stat5* Impairs Crypt Regeneration to Deteriorate Radiation-Induced Mucositis

Dose-controlled radiation injury functionally distinguishes the IESC regenerative response (Hua et al., 2012; Metcalfe et al., 2014). After a high-dose exposure, CBCs un-

dergo rapid apoptosis or mitotic death, whereas quiescent IESCs can be active and regenerate highly proliferative crypts (“microcolonies”) (Potten, 2004; Yan et al., 2012). Thus, we exposed both STAT5<sup>-/-</sup> and control mice to different doses of  $\gamma$  radiation (8.5, 12, or 15 Gy) and investigated IESC regenerative activity 3.5 days later. After exposure to 8.5 Gy radiation, which induces apoptosis and hyperproliferation of CBCs, but does not activate quiescent IESCs (Montgomery et al., 2011), STAT5<sup>-/-</sup> mice displayed moderate depletion of crypt numbers and mild crypt hyperplasia (Figure 2A), and pronounced flattened/blunt villi in jejunum compared with controls (Figure S2A). A dose of 12 Gy radiation led to intestinal mucositis in all mice (Figure 2B). STAT5<sup>-/-</sup> mice exhibited worse mucosal injury with a higher radiation injury score (RIS) and mucosal ulceration compared with controls (Figure 2B). Quiescent IESCs have been suggested to represent an IESC subpopulation that is committed to differentiation to Paneth cells or endocrine lineages, and can replenish the IESC pool upon injury (Buczacki et al., 2013). We found that depletion of STAT5 led to increased “immature” crypts in the ileum and jejunum, which were characterized by impaired regeneration and repair of irradiation-induced mucosal injury. The “immature” crypt regeneration coincided with an increased number of lysozyme<sup>+</sup> Paneth cells (Figures 2B, S2B, and S2C), suggesting that quiescent IESCs could be activated in STAT5<sup>-/-</sup> mice. To rule out the influence of IEC barrier differentiation defects in STAT5<sup>-/-</sup> mice on the radiation response, we crossed *Villin-CreER<sup>T2</sup>* with *Stat5<sup>fl/fl</sup>* mice to inducibly deplete IEC STAT5 using tamoxifen (Tam)-dependent Cre recombinase activation (STAT5 $\Delta^{-}$ ). LGR5<sup>+</sup> CBCs can be greatly diminished after 12 Gy radiation, but a fraction of surviving LGR5<sup>+</sup> CBCs may overcome the G1 arrest to reenter the cell cycle after DNA damage repair is completed (Hua et al., 2012; Van Landeghem et al., 2012). We thus escalated the radiation

### Figure 2. *Stat5* Depletion Dampens IESC Regenerative Activity and Increases Radiation-Induced IESC Injury

(A and B) STAT5<sup>-/-</sup> and STAT5<sup>+/+</sup> mice were exposed to  $\gamma$  radiation (8.5 or 12 Gy). Crypt proliferation in the ileum was determined 3.5 days after an initial 8.5 Gy radiation (A), and the RIS and crypt regeneration were determined 3.5 days after 12 Gy radiation (B). Results are expressed as mean ± SEM (*n* = 6 mice per group; \*\**p* < 0.01).

(C–E) IEC STAT5 was depleted by intraperitoneal (i.p.) administration of Tam (1 mg/mouse/day) for 5 consecutive days; simultaneously, controls were injected with sunflower oil. RIS and mucosal ulceration (C and D) and crypt regeneration (C and E) were determined in the mice with constitutive or inducible depletion of IEC STAT5 (STAT5<sup>-/-</sup> or STAT5 $\Delta^{-}$ ) at 3.5 days after 15 Gy radiation. Ulcer area is designated by brackets in (C). Results are expressed as the mean ± SEM (*n* ≥ 6 mice per group; \**p* < 0.05).

(F) Apoptotic IECs in the regenerated ileal crypts were detected by TUNEL staining and expressed as TUNEL<sup>+</sup> IECs per regenerated crypt. Results are expressed as the mean ± SEM (*n* = 5 mice per group; \*\**p* < 0.01). Representative images are shown.

(G) STAT5<sup>-/-</sup> and STAT5 $\Delta^{-}$  mice were exposed to 8.5, 12, or 15 Gy radiation. At 3.5 days after radiation, mice were administered with BrdU and sacrificed 3 hr later. The percentages of proliferative IECs in the crypts or regenerated crypt were measured by BrdU incorporation. Results are expressed as the mean ± SEM (*n* = 5 mice per group; \**p* < 0.05).

(H) *Lgr5CreER;STAT5<sup>+/+</sup>* and *VilCre;Lgr5CreER;Stat5<sup>fl/fl</sup>* mice were exposed to 15 Gy radiation. Ileal frozen sections were double stained with LGR5 GFP (green) and lysozyme (red). Representative images are shown (*n* = 3 mice per group).

Scale bars, 50  $\mu$ m. See also Figure S2.

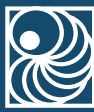

dose to 15 Gy and investigated the inducible depletion of STAT5 upon intestinal crypt regeneration (Hua et al., 2012). Consistently, inducible STAT5 depletion led to a significantly worse RIS and more severe mucosal injury compared with Tam-treated littermate controls (STAT5<sup>+/+</sup>) (Figures 2C and 2D). STAT5<sup>Δ/−</sup> mice also contained a significantly higher number of “immature” regenerated crypts (Figures 2C and 2E). Interestingly, by TUNEL staining, we found that the regenerative crypts with STAT5 deficiency displayed more apoptotic IECs than control mice after irradiation (Figure 2F), suggesting that STAT5 plays a non-redundant role in controlling crypt regeneration during injury. BrdU incorporation confirmed that 8.5 Gy radiation reduced intestinal crypt epithelial proliferation in the STAT5<sup>−/−</sup> mice compared with littermates (Figure 2G). However, 15 Gy radiation induced more crypt epithelial regenerative proliferation with greater apoptotic IECs in the STAT5<sup>Δ/−</sup> mice compared with Tam-treated littermate controls (Figures 2F, 2G, and S2D). These data indicate that STAT5 deficiency alters the regenerative capacity of IESCs, leading to “immature” crypt regeneration after irradiation. IEC STAT5-deficient mice with the *Lgr5* reporter gene were then exposed to 15 Gy irradiation (Figure 2H). LGR5 GFP and lysozyme double IF staining showed that inducible depletion of STAT5 reduced LGR5<sup>+</sup> IESCs, whereas lysozyme<sup>+</sup> Paneth cells were coincidentally increased in the “immature” regenerated crypts compared with littermate controls (Figure 2H), indicating increased radiation-induced damage in STAT5<sup>Δ/−</sup> mice. These regenerated crypts had less *Ascl2* abundance than controls (Figure S2E), suggesting that STAT5 signaling is required for LGR5<sup>+</sup> IESC regeneration upon radiation injury. Together, these data indicate that depletion of STAT5 impairs crypt regeneration, and STAT5 is indispensable for IESC regenerative activity to repair mucosal injury. We next tested the possible mechanisms of how STAT5 controls IESC regeneration.

### Depletion of *Stat5* Inhibits CBC Activity, Leading to Reduced Crypt Expansion

To recapitulate STAT5 loss-of-function (LOF) phenotypes in vitro, we isolated mouse intact crypts from STAT5<sup>−/−</sup> and STAT5<sup>Δ/−</sup> mice, and generated intestinal enteroids to observe crypt formation over time. We found that enteroids from STAT5<sup>−/−</sup> mice were not capable of budding and forming crypts with the same enriched conditions as control enteroids (Figures 3A and S3A). The enteroids with Tam-inducible STAT5 depletion in IEC exhibited limited crypt expansion and formation (Figures 3A and 3B), indicating that STAT5 LOF dampened CBC self-renewal and differentiation. Intriguingly, the expression of *Bmi1* was significantly increased by STAT5 depletion, whereas *Lgr5* expression remained unaltered in the enter-

oids as assessed by quantitative PCR (qPCR; Figure S3B), suggesting that depletion of STAT5 could lead to BMI1<sup>+</sup> IESC activation. However, using *VilCreER;Lgr5CreER;Stat5<sup>fl/fl</sup>* mice, we found that inducible STAT5 depletion resulted in reduced LGR5-GFP<sup>+</sup> crypt buds in the enteroids (Figure 3C). Therefore, depletion of STAT5 inhibits CBC activity.

### Transgenic Mice with Inducible Expression of a Gain-of-Function *Stat5* Variant

To study STAT5 gain of function (GOF) upon IESC response to gut injury, we generated an inducible transgenic mouse model with a GOF variant of *Stat5a* (termed icS5) using bacterial artificial chromosome (BAC) recombineering (Muyrers et al., 1999). We selected the BAC RP23-362J7, which encompasses the entire endogenous *Stat5a* and *Stat5b*. The transgene vector was constructed with the appropriate 3' and 5' homologous arms and the enhanced and prolonged active *Stat5a* variant (FLAG tagged at the C terminus). Truncated human CD2 was used as a transgenic reporter marker (Figure S4A). We then performed RecE and RecT recombination of the construct into the BAC. The final BAC harbored the icS5-FLAG-IRES-hCD2 construct, flanked by LoxP sites in an antisense orientation within the endogenous *Stat5a* locus (Figure S4A). This allowed expression of the icS5 construct under regulation of the endogenous promoter after Cre recombination (Figure 4A). The recombination of the construct into the BAC was confirmed by two independent Southern blot strategies (for further details, see the Supplemental Experimental Procedures and Figures S4B–S4D).

### STAT5 Activation Increases CBC Proliferation and Expands the IEC Progenitor Pool, Conferring Resistance to Radiation-Induced Intestinal Injury

We next crossed icS5 mice with *Rosa26-CreER<sup>T2</sup>* mice (*RsCreER;icS5*) to induce Cre-LoxP inversion (Figure 4B). The *RsCreER;icS5* mice were then treated with Tam, and recombination of the *icS5* transgene into the “on” orientation was confirmed by Southern blot (Figure S4B). Genomic recombination was detected in all organs tested, and full activation of the transgene reflected a monoallelic expression of the icS5 GOF variant, which is very sensitive to cytokine signaling. In liver, lung, kidney, bone marrow, and splenocytes, Southern blotting (Figure S4E) or FACS displayed hCD2, the reporter marker that is transcriptionally linked to icS5 preceded by an IRES sequence (Figure S4F). We also tested STAT5 activation (PY-STAT5) in the intestine. Ileal sections were stained with PY-STAT5 IH (Figure 4B) or the total proteins from isolated ileal IECs were immunoblotted for STAT5a or PY-STAT5 (Figure 4C). We found that STAT5 was robustly activated in IECs from Tam-induced *RsCreER;icS5* mice

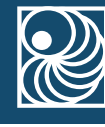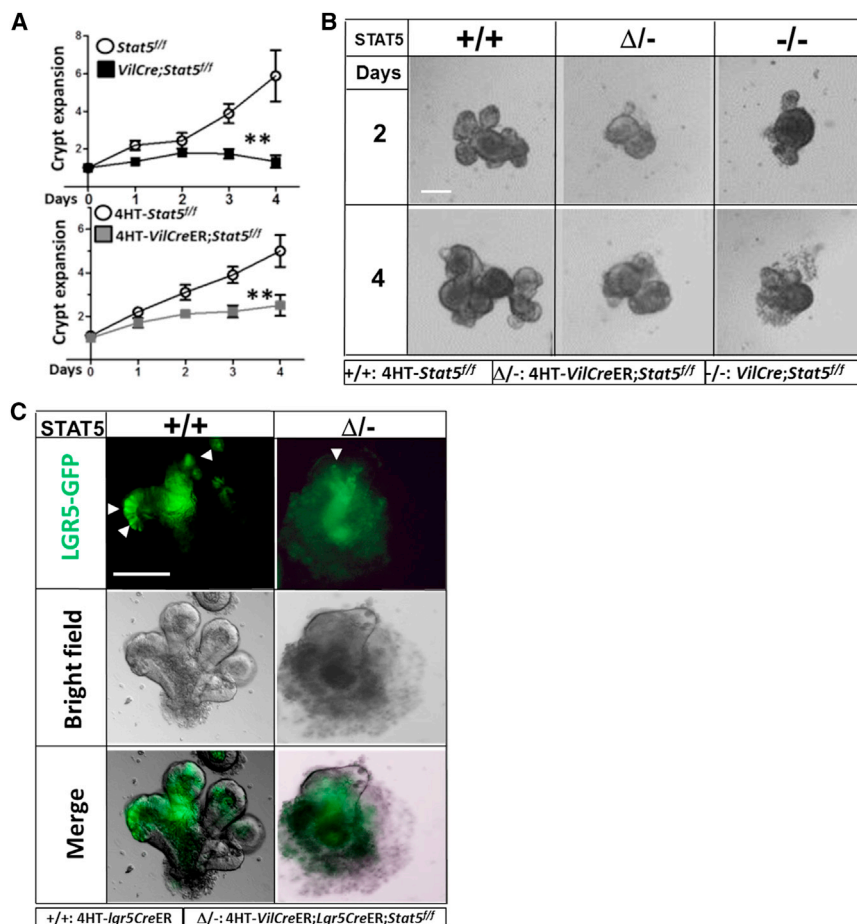

### Figure 3. *Stat5* Depletion Reduces IESC Proliferation

(A and B) Ileal crypts were isolated from *Stat5<sup>fl/fl</sup>*, *VilCreER;Stat5<sup>fl/fl</sup>*, and *VilCre;Stat5<sup>fl/fl</sup>* mice, and resuspended in Matrigel with EGF, Noggin, and R-spondin for culture from day 1 through day 8. Then, 4-hydroxy-tamoxifen (4HT, 1 μM) was used to induce STAT5 depletion in the enteroids. Enteroids were cultured in six parallel wells per mouse for each experiment (n = 4 mice per group). The number of crypt buds was counted daily in a minimum of 10 enteroids per well with either persistent or 4HT-induced STAT5 depletion (−/− or Δ/−).

(A) Results are expressed as a graph of crypt expansion, showing the number of crypt buds versus time. One-way ANOVA was used to test for variance of two groups (\*\*p < 0.01).

(B) Representative expanded crypts are shown.

(C) Ileal crypts were isolated from *Lgr5CreER* and *VilCreER;Lgr5CreER;Stat5<sup>fl/fl</sup>* mice. GFP fluorescence and bright-field images of single LGR5-GFP cells in 7-day-old enteroids are shown. The data are representative of three independent experiments.

Scale bars, 100 μm. See also Figure S3.

(*Tam-RsCreER;ic55*, hereafter called *STAT5<sup>+++</sup>*; Figure 4C), which was mainly distributed in the ileal IESC and TA zone (Figure 4B). BrdU incorporation and Ki67 staining exhibited a pronounced crypt IEC proliferation compared with sunflower oil-treated *RsCreER;ic55*, Tam-induced *ic55* (*STAT5<sup>+/+</sup>*), or Tam-induced *VilCreER;Stat5<sup>fl/fl</sup>* mice (*STAT5<sup>Δ/-</sup>*; Figures 4D and 4E). In particular, more proliferative CBCs were observed in *STAT5<sup>+++</sup>* mice than in *STAT5<sup>+/+</sup>* mice (insets in Figure 4D). These proliferating crypt IECs led to an elongated ileal crypt depth (Figure 4F) and villus height (Figures 4F and S5A) with enhanced IEC growth (Figure 4H), suggesting that in vivo activation of STAT5 enhances IESC self-renewal, leading to intestinal growth. We then exposed *STAT5<sup>+++</sup>* mice to 15 Gy radiation. These mice exhibited milder mucositis compared with oil-induced *RsCreER;ic55* or Tam-induced *ic55* mice (Figure 4I). Intriguingly, 3.5 days after radiation, activation of STAT5 in mice gave rise to more regenerated crypts (Figure 4J) with robust expression of STAT5a and BrdU<sup>+</sup> IECs (Figure S5B) compared with controls. Using Tam-inducible Cre recombinase driven by the IEC-specific *Villin* promoter,

STAT5 was inducibly activated in the IECs. We consistently found that inducible activation of IEC STAT5 enhanced CBC proliferation in the ileum and jejunum (quantified as BrdU<sup>+</sup> CBC per SC zone), and increased ileal crypt depth and crypt regeneration (Figures S5C and S5D). These data demonstrate that activation of IEC STAT5 may promote more active IESCs, leading to functional crypt regeneration. In contrast to depletion of IEC STAT5, activation of IEC STAT5 reduced the expression of quiescent markers (LRIG1 and DCLK1) as measured by IF and immunoblotting, suggesting a diminished number of quiescent IESCs in the STAT5-activated mice (Figure S5E). Therefore, our data suggest that GOF of STAT5 promotes IESC regeneration to repair intestinal injury.

### STAT5 Activation Promotes IESC Self-Renewal, Leading to Increased Crypt Expansion

To recapitulate our in vivo observation of STAT5 activation upon IESC activity, we cultured IESCs from *RsCreER;ic55* mice and then induced activation of STAT5 using Tam. We found that STAT5 activation significantly enhanced



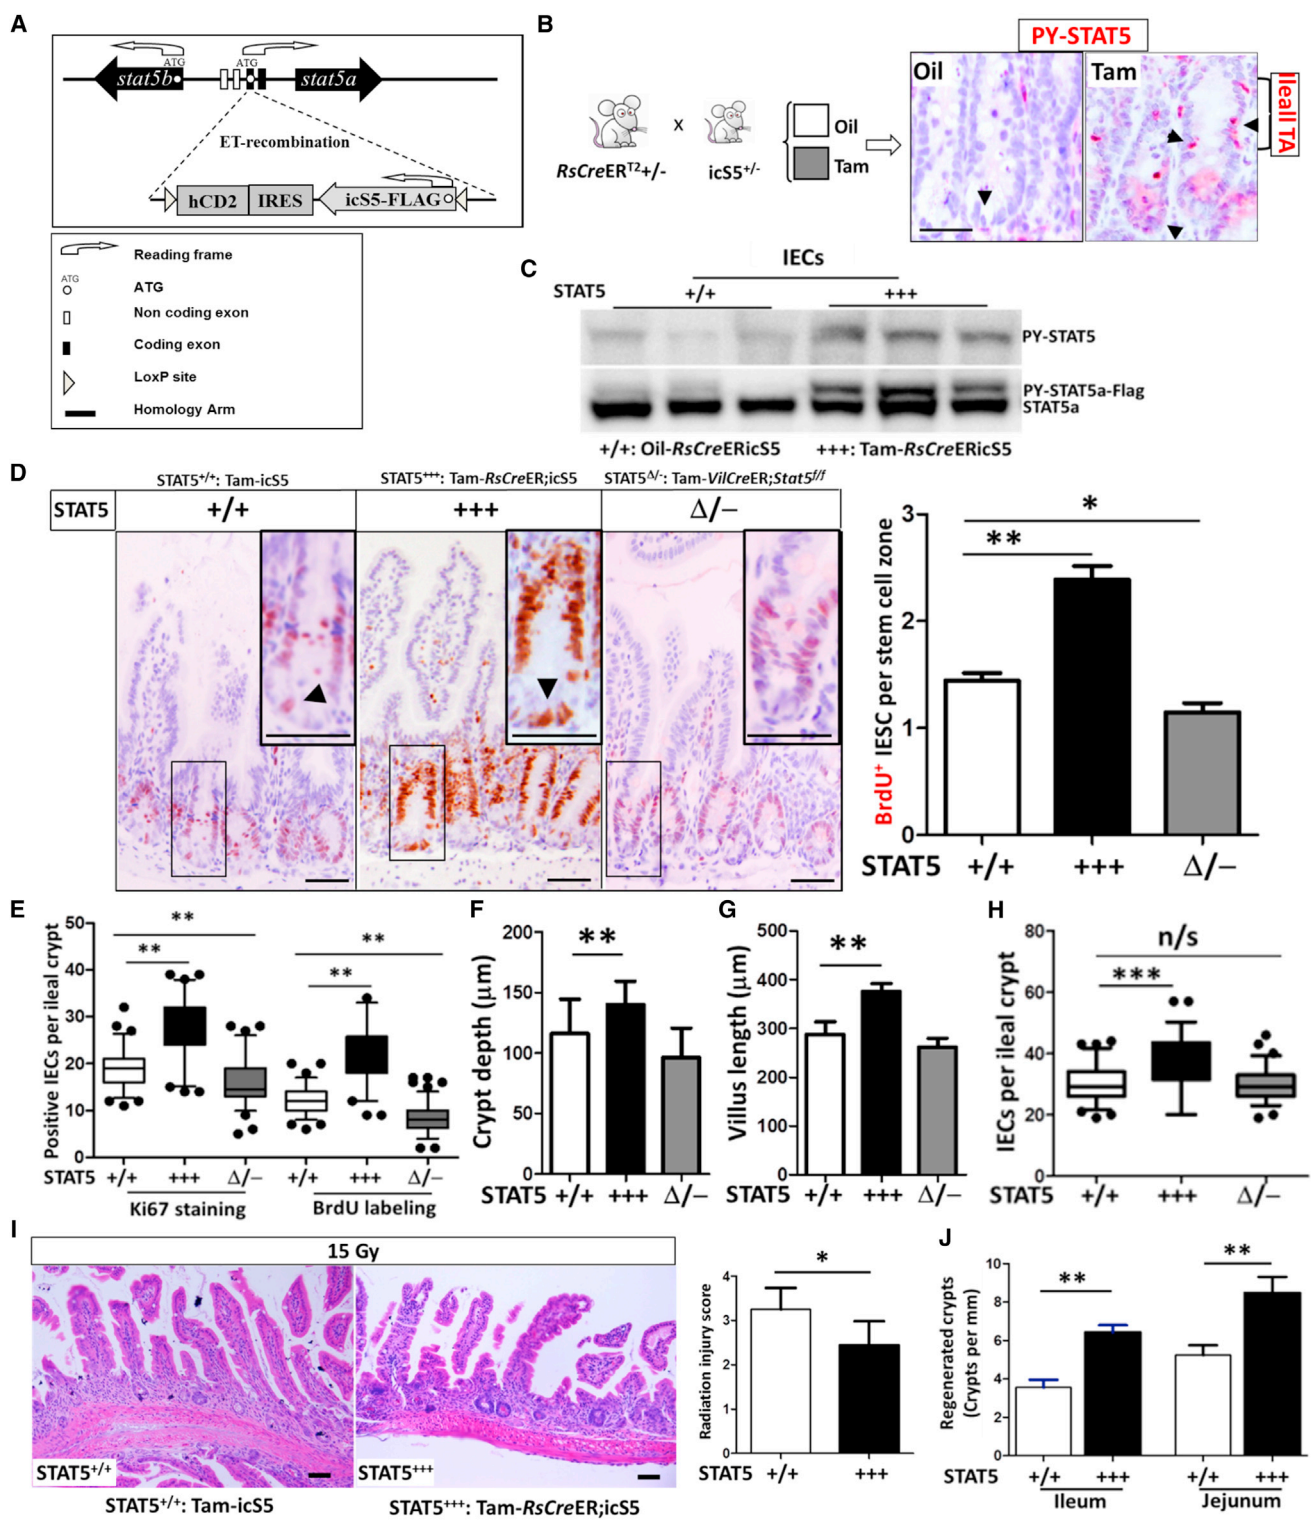

**Figure 4. STAT5 Activation Increases CBC Proliferation and Expands the IEC Progenitor Pool, Conferring Resistance to Radiation-Induced Intestinal Injury**

(A) Schematic representation of the BAC construct used to generate inducible GOF *Stat5a*. The endogenous *Stat5a* locus in transgenic BAC is replaced by the *ic5S* construct in the "off" orientation. The transgene can be switched "on" upon recombination by Cre recombinase, leading to the expression of *ic5S* under endogenous promoter regulation.

(legend continued on next page)



crypt expansion (Figure 5A) along with a strongly upregulated *Lgr5* expression in the IESCs compared with control enteroids (Figure 5B). We then crossed *Lgr5CreER* mice with *RsCreER;icS5* mice and cultured LGR5<sup>+</sup> IESCs. Consistently, FACS analysis showed that the frequency of LGR5<sup>+</sup> IESCs was markedly increased by Tam-induced STAT5 activation (Figure 5C). These data suggest that STAT5 activation increases LGR5<sup>+</sup> active IESC self-renewal. We then sought to determine whether our finding that STAT5 signaling impacts the regulation of mouse IESC activity is more broadly applicable to other SC types. To that end, we selected H1 human ESCs (hESCs) to confirm the findings from our adult mouse IESCs. We used lentivirus harboring a Tam inducible STAT5a (STAT5a-ER\* or icS5-ER\*; Figure S6A; Grebien et al., 2008) to transduce the hESC cells. In this system, we were able to ectopically express activated STAT5 by addition of Tam (Figure 5D). We found that STAT5 activation significantly increased LGR5 (Figure 5D) and promoted hESC cellular proliferation as assessed by BrdU incorporation (Figure 5E), suggesting that the ability of STAT5 to regulate SC activation in vitro is not confined to mouse IESCs. Taken together, these results indicate that activation of STAT5 can accelerate CBC proliferation and enhance crypt formation and differentiation.

### STAT5 Activation Increases Colonic IESC Growth in Response to Colitis-Induced Epithelial Injury and Ulceration

Dextran sodium sulfate (DSS)-induced colonic mucosal ulceration can be repaired by direct implantation of LGR5<sup>+</sup> IESCs or significantly improved by induction of IESC proliferation (Ju et al., 2013; Yui et al., 2012). To explore the potential for clinical application of genetic activation of *Stat5*, we tested enhanced STAT5 activation upon experimental colitis-induced IEC injury. We first tested the effect of GOF of STAT5 on colonic IESCs in vivo. Similar to what was observed for ileal IESCs, inducible activation of STAT5 increased colonic IESC proliferation (Figures 6A and 6B), colonic crypt depth, and growth compared with

controls (Figures 6C and 6D). These data indicate that activation of STAT5 leads to colonic epithelial growth by promoting IESC proliferation. We then exposed icS5 and *RsCreER;icS5* mice treated with oil or Tam to 3% DSS for either a 7-day acute injury or a 5-day DSS exposure after 5-day water recovery (Gilbert et al., 2012). STAT5<sup>+++</sup> mice exhibited resistance to DSS-induced colonic mucosal inflammation as characterized by lower histopathological scores, less crypt loss, and smaller ulcer area compared with controls (Figures 6E and 6F), but displayed mildly increased immune cell infiltration. However, after water recovery, there was no significant difference in colonic histological score between STAT5<sup>+++</sup> and control mice (Figures S6B and S6C). These investigations further confirmed that activation of STAT5 protects against colonic epithelial injury, possibly through induction of colonic IESC growth. Thus, STAT5 is a functional therapeutic target to improve the regenerative response to gut inflammation.

### STAT5 Binds Directly to the *Bmi1* Locus and STAT5 Activation Represses *Bmi1* Expression

Human colonic carcinoma Caco-2 cells spontaneously differentiate into an enterocyte-like phenotype expressing IESC markers such as *LGR5* and *BMI1* (Pereira et al., 2013). To further explore the molecular mechanisms of how activated STAT5 enhances active IESC activity, we transduced subconfluent Caco-2 cells with lentivirus harboring a Tam-regulatable STAT5a (STAT5a-ER\* or icS5-ER\*; Figure S6A). Initially, we demonstrated that Tam exposure stimulated the activation of STAT5 (Figure 7A). Given that STAT5 plays a critical role in *trans*-activating or *-repressing* target genes (Stine and Matunis, 2013), we then scanned the *Bmi1* locus for putative STAT5 binding sites using the inverted repeat consensus (TTC(N3)GAA). Computational prediction indicated that there were seven putative binding sites in the human *Bmi1* locus (Tables S1A and S1B) and 13 putative binding sites in the mouse *Bmi1* locus (Tables S2A and S2B). Based on these predictions, we utilized chromatin immunoprecipitation (ChIP) assay to

(B and C) icS5 transgenic mice were crossed with *RsCreER;icS5* mice. *RsCreER;icS5* mice were then injected with oil or Tam.

(B) Tyrosine phosphorylated STAT5 (PY-STAT5) (pink, arrows) was determined in intestine by IH.

(C) IECs were isolated from oil- or Tam-treated *RsCreER;icS5* mice (STAT5<sup>+++</sup>), and PY-STAT5 and STAT5a were determined by immunoblotting (n = 4 mice per group).

(D–H) Five days after Tam-induced STAT5 activation, IEC or CBC proliferation was determined by in situ BrdU incorporation or Ki67 staining. BrdU<sup>+</sup> and Ki67<sup>+</sup> IECs were quantified as positive IECs per IESC zone (D) or per ileal crypt (E). Ki67<sup>+</sup> CBCs (arrows in the insets) and IECs were markedly increased by activation of STAT5, in contrast to the reduction of proliferating CBCs in STAT5-depleted crypts (D and E). Representative images are shown in (D). Ileal growth was evaluated according to crypt depth (F) and villus length (G), and the total cell count per ileal crypt (H) was measured using ImageJ. Results are expressed as the mean ± SEM (n = 6 mice per group; \*\*p < 0.01, \*\*\*p < 0.001).

(I and J) Mice with inducible STAT5 activation were exposed to  $\gamma$ -radiation. At 3.5 days after the initial 15 Gy radiation, the RIS (I) and crypt regeneration (J) were determined. Results are expressed as the mean ± SEM (n = 6 mice per group; \*p < 0.05, \*\*p < 0.01).

Scale bars, 50  $\mu$ m. See also Figures S4 and S5.

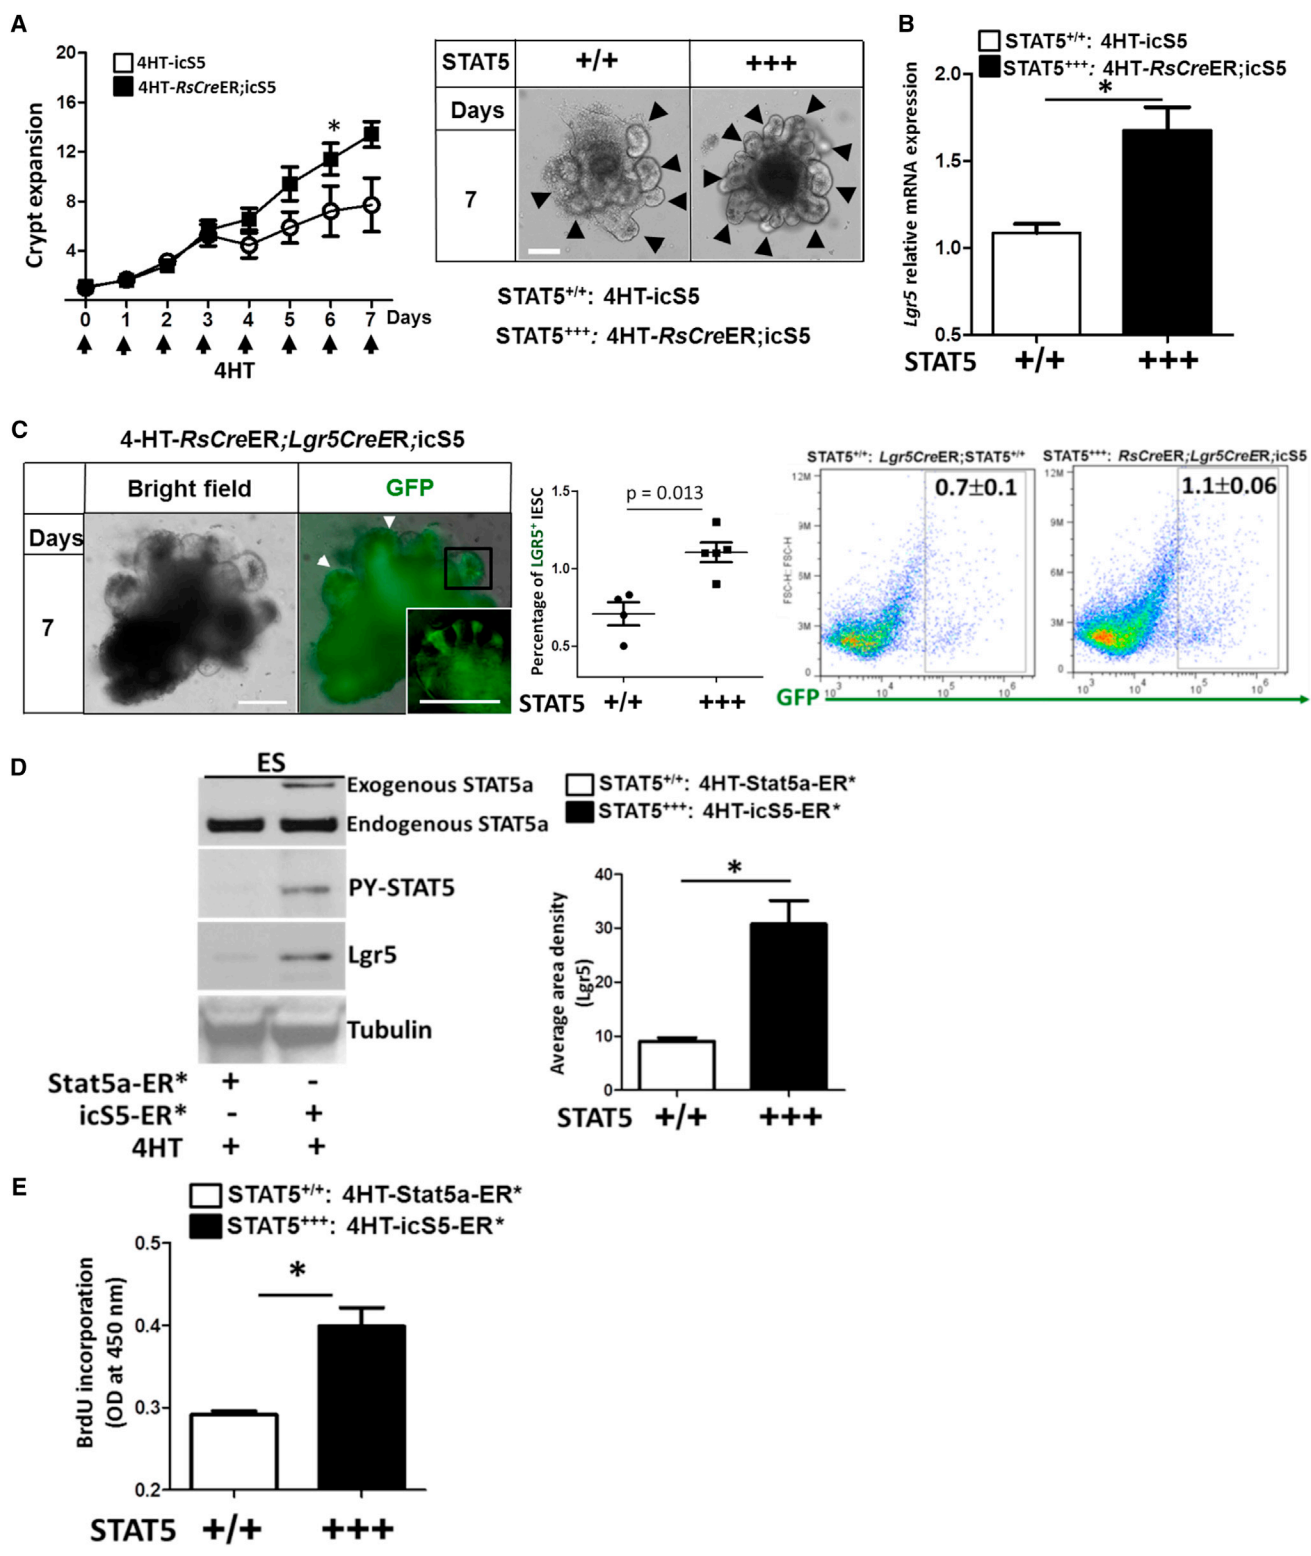

**Figure 5. STAT5 Activation Promotes IESC Activity, Increasing Crypt Expansion**

Ileal and jejunal crypts were isolated from icS5 and RsCreER;icS5 mice and cultured for 8 days; 200 nM 4HT was used to induce STAT5 activation during culture.

(legend continued on next page)



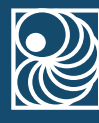

study interactions between STAT5 protein and the *Bmi1* locus. In Caco-2 cells, ChIP analysis with anti-STAT5 antibodies or control immunoglobulin G (IgG) followed by qPCR identified two GAS motifs (sites 2 and 4) in the *BMI1* locus that showed mild STAT5 binding enrichment (Figure 7B) and in which the STAT5 binding intensity was significantly elevated by genetic activation of STAT5 (Figure 7B). To test our finding with primary cells, we next isolated mouse ileal crypts and subjected these crypts to in vivo ChIP analysis with anti-FLAG antibodies or control IgG to immunoprecipitate STAT5. We identified three GAS motifs (sites 1, 2, and 4) that exhibited moderate STAT5 binding enrichment, and two binding sites (sites 1 and 4) that revealed a markedly increased STAT5 binding intensity by genetic activation of *STAT5* (Figure 7C). These ChIP data indicate that STAT5 protein can bind to the *Bmi1* locus, and enhanced STAT5 protein activity correlates with more *Bmi1* locus binding. Finally, we measured *Bmi1* mRNA expression. We found a significant reduction of *Bmi1* mRNA levels in ileal crypts of *Stat5*-activated mice compared with wild-type controls (Figure 7D). Collectively, our data suggest that activation of STAT5 controls IESC regeneration in mouse small intestines and human colonic cells in part through repression of *Bmi1* expression.

## DISCUSSION

I ESCs and intestinal progenitor cells maintain intestinal homeostasis and regeneration in response to gut injury (Zhang et al., 2014). LGR5<sup>+</sup> I ESCs play a critical role in intestinal homeostasis and regeneration (Metcalf et al., 2014; Van Landeghem et al., 2012). Interestingly, BMI1<sup>+</sup> I ESCs are able to replenish LGR5<sup>+</sup> I ESC upon small-intestinal injury or regeneration (Yan et al., 2012). However, the molecular mechanisms that regulate these two I ESC populations remain largely unexplored. Mucosal cytokines regulate I ESC responses to inflammation, in part by JAK-STAT signaling (Farin et al., 2014; Jiang et al., 2009). In this study,

we investigated whether cytokine-STAT5 signaling plays a role in modulation of these two I ESC populations during I EC regeneration. Based on the combined results of our LOF and GOF studies of STAT5 in murine models with cultured mouse or human SCs, we propose a model in which, first, loss of STAT5 impairs rapidly cycling I ESCs (Figure 7E-I), and second, genetic activation of *Stat5* promotes CBC proliferation and regeneration (Figure 7E-II). However, our current data cannot exclude the potential effects of STAT5 signaling on intestinal progenitors or mucosal cytokine secretion. Interestingly, ChIP analyses identified STAT5 binding to the *Bmi1* locus, suggesting that activated STAT5 could directly regulate key genes involved in I ESC identity. Collectively, STAT5 controls adult I ESC activity upon intestinal injury. PY-STAT5 could be developed as a biomarker for I ESC regeneration of inflamed epithelia.

Previous studies have used acute irradiation-induced injury models to provide mechanistic insight into the regeneration process, revealing that actively proliferating I ESC (active I ESC) and slowly proliferating I ESC (quiescent I ESC) populations occur within the lower regions of the crypt (Barker et al., 2007; Tian et al., 2011). Quiescent I ESCs can be activated to replenish injured active I ESCs upon high-dose irradiation (Tian et al., 2011). However, it is unclear which doses of irradiation can activate the quiescent I ESCs (Hua et al., 2012; Potten, 2004; Yan et al., 2012). We found that 12 Gy irradiation did not completely ablate all ileal crypt regeneration in *STAT5*<sup>-/-</sup> mice, whereas 15 Gy irradiation significantly diminished the regeneration of ileal crypts in *STAT5*<sup>-/-</sup> mice. Thus, we utilized 15 Gy irradiation to investigate the effects of STAT5 LOF or GOF on I ESC regeneration and “microcolony” formation.

It was previously reported that conditional deletion of HSC STAT5 results in loss of quiescence associated with reduced survival and loss of the long-term HSC pool (Wang et al., 2009). Conversely, hyperactivation of STAT5 increases erythroid differentiation, and low or intermediate activation of STAT5 enhances self-renewal of HSCs (Wierenga et al., 2008). Interestingly, oncogenic *Nras*<sup>G12D</sup>

(A) The number of ileal crypt buds was counted per enteroid ( $n \geq 10$ ) from each of six wells from three independent experiments. The results are expressed as a graph of crypt buds versus time; the data are representative of three independent experiments. One-way ANOVA was used to test for variance of two groups ( $*p < 0.05$ ). Representative images are shown; arrows indicate the expanded crypts.

(B) *Lgr5* expression was analyzed by qPCR in 4HT-treated ileal enteroids cultured from *ic55* and *RsCreER;ic55* mice. Results are expressed as the mean  $\pm$  SEM ( $n = 5$  mice per group;  $*p < 0.05$ ).

(C) The frequency of LGR5<sup>+</sup> GFP cells was detected by FACS in 7-day old enteroids cultured from *Lgr5CreER;STAT5*<sup>+/+</sup> and *RsCreER;Lgr5CreER;ic55* mice. Results are expressed as the mean  $\pm$  SEM ( $n = 4$  or 5 mice per group).

(D and E) H1 hESCs were transduced with lentiviral vectors expressing STAT5a-ER\* or *ic55*-ER\* variants.

(D) After puromycin selection, 200 nM 4HT was used to induce STAT5 activation. Total proteins were then extracted for anti-STAT5a, anti-PY-STAT5, anti-LGR5, and anti-Tubulin immunoblottings.

(E) H1 hESCs ( $2 \times 10^4$  cells/ml) were seeded into 96-well plates and BrdU incorporation was used to measure cell proliferation. Data represent three independent experiments and results are expressed as the mean  $\pm$  SEM ( $*p < 0.05$ ).

Scale bars, 100  $\mu$ m. See also Figure S6.

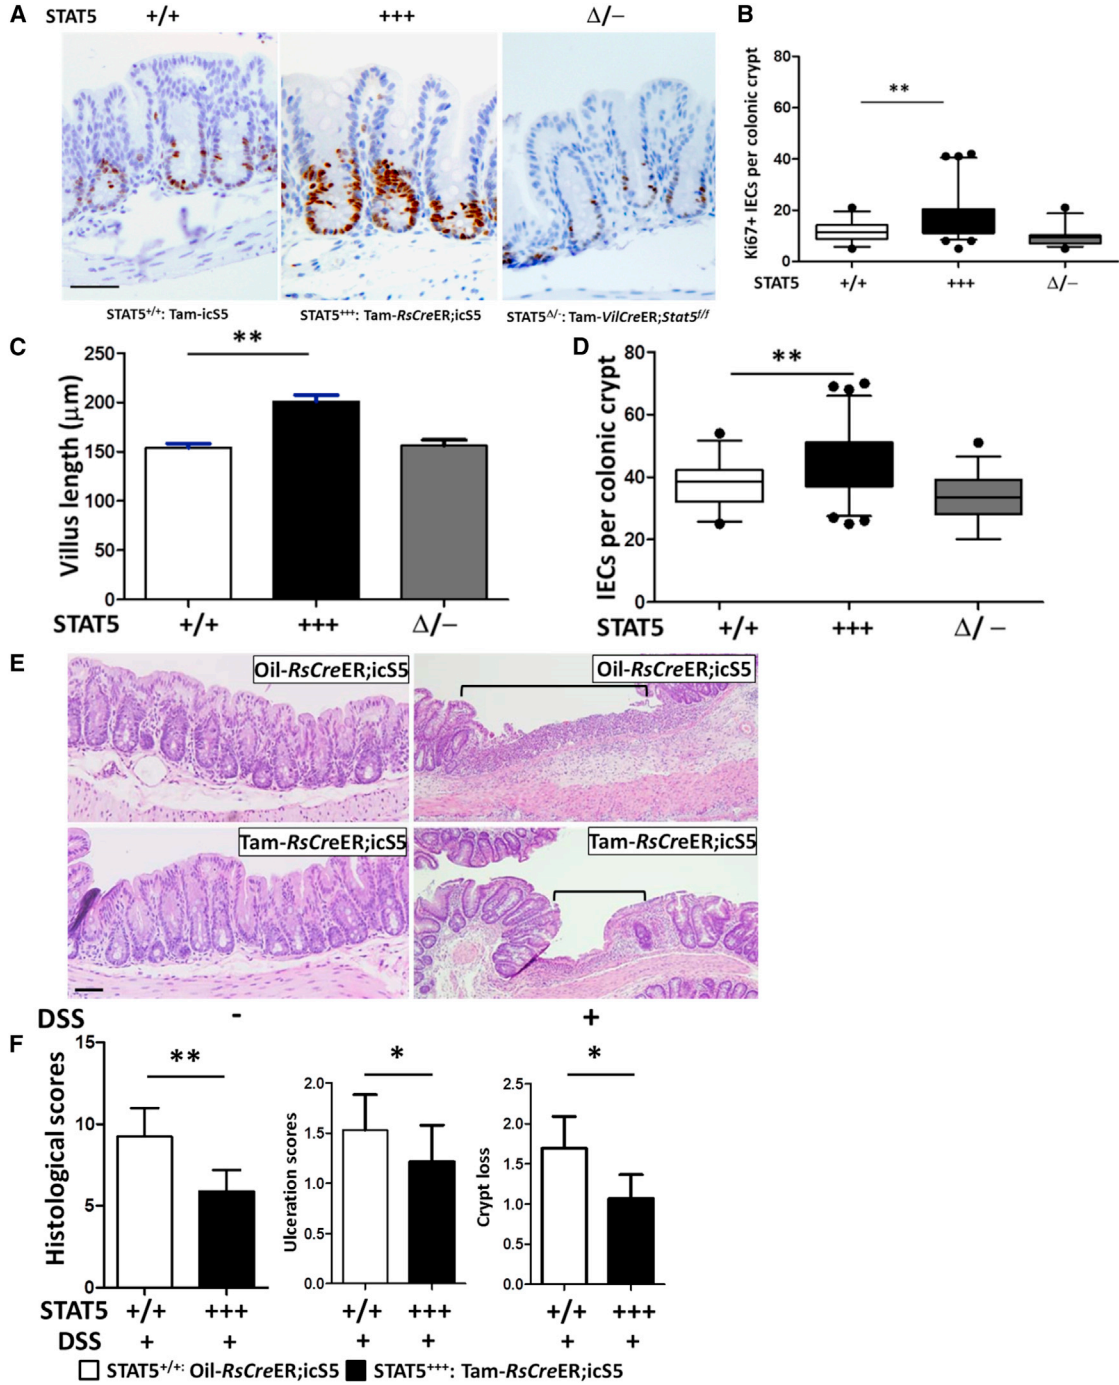

**Figure 6. STAT5 Activation Increases Colonic IESC Growth to Protect against Colitis-Induced Epithelial Injury and Ulceration**

(A–D) Colonic IEC proliferation was determined by Ki67 IH (A), and Ki67<sup>+</sup> colonic IECs were increased by inducible activation of STAT5 (B). Colonic growth was measured by villus length (C) and total cell count per colonic crypt (D). Results are expressed as the mean  $\pm$  SEM (n = 8 mice per group; \*p < 0.05, \*\*p < 0.01).

(E and F) Colonic inflammation was induced by 3% DSS for 7 days. Hematoxylin and eosin staining revealed significant resistance to DSS-induced colonic injury and ulceration in STAT5<sup>+/-</sup> mice. Ulcer area is designated by brackets in (E). Mucosal injury, colonic mucosal ulceration, and crypt loss are scored in (F). Results are expressed as the mean  $\pm$  SEM (n = 6 or 8 mice per group; \*p < 0.05). Scale bars, 50  $\mu\text{m}$ . See also Figure S6.

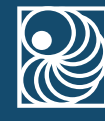

activation in HSCs defined a key role for STAT5 signaling in mediating both the increased proliferation and engraftment potential of *Nras*<sup>G12D/+</sup> HSCs (Li et al., 2013). Here, we demonstrated that depletion of IEC STAT5 caused inhibition of CBC self-renewal, leading to limited crypt expansion in the cultured enteroids. In contrast, ectopic activation of STAT5 increased IESC proliferation and regeneration to promote crypt expansion. Therefore, STAT5 activity is required for IESC self-renewal and regenerative activity. However, our finding does not rule out possible effects of *Stat5* depletion on IESC survival. In future studies, we will further measure the efficiency of enteroid formation with single IESCs to determine the direct effects of STAT5 on IESCs.

BMI1<sup>+</sup> IESCs have a slower rate of proliferation compared with LGR5<sup>+</sup> IESCs and can give rise to all IEC lineages, particularly during recovery from injury (Sangiorgi and Capecchi, 2008; Yan et al., 2012). However, there is no clear evidence of a cytokine-signaling pathway that regulates their switch from quiescence to active cycling. Our data show that deletion of IEC STAT5 led to increased expression of quiescent IESC makers in the crypts, suggesting that quiescent IESCs could be activated in the STAT5<sup>-/-</sup> mice. After exposure to radiation, STAT5 LOF mice displayed impaired crypt regeneration and developed more severe mucositis compared with controls. These data suggest that loss of STAT5 impairs IESC regenerative responses to small-intestinal injury, possibly by hindering the conversion from quiescent to active IESCs. In sharp contrast to STAT5 LOF, STAT5 activation repressed BMI1, LRIG1, and DCLK1 expression, and increased *Lgr5* expression in mouse and human SCs. Inducible activation of STAT5 increased CBC activity to promote crypt regeneration, reducing radiation-induced mucosal injury. Interestingly, we found several putative STAT5 binding sites in the mouse *Bmi1* and human *BMI1* loci. ChIP analysis with *Bmi1*-specific primers demonstrated that hyperactivation of STAT5 increased STAT5 binding affinity at the *Bmi1* locus. Accordingly, our data indicate that on the one hand, STAT5 signaling maintains IESC homeostatic proliferation, and on the other hand, activated STAT5 signaling gives rise to LGR5<sup>+</sup> IESCs for injury-induced regeneration. These data suggest a model (Figure 7E) in which activated STAT5 signals promote IESC regeneration to reconstitute the impaired IECs, possibly by converting quiescent IESCs to active IESCs.

Intestinal secretory precursors can convert to IESCs upon irradiation injury to regain stemness (van Es et al., 2012). Interestingly, inhibition of CBC proliferation can induce premature differentiation of CBCs into Paneth cells (Lee et al., 2009). We found that depletion of *Stat5* led to a reduction of LGR5<sup>+</sup> IESCs coincidentally with increased lysozyme<sup>+</sup> Paneth cells in response to irradiation injury. Thus, these

data suggest that STAT5 maintains IESC homeostasis in part by mediating secretory lineage differentiation, in addition to potential effects on quiescent IESCs. Furthermore, mucosal cytokine release could be critical for maintaining IESC homeostasis and response to gut injury (Farin et al., 2014). Our data demonstrate that activated STAT5 signaling increases IESC proliferation and regeneration to mitigate intestinal inflammation, possibly by affecting multiple intestinal compartments. In future studies, we will investigate which upstream cytokines of STAT5 are involved in the regulation of IESC responses to gut injury, and how to increase IESC survival by activating *Stat5*.

Taken together, our results demonstrate an essential role for STAT5 in the regulation of adult IESC homeostasis and response to intestinal injury and regeneration. Functionally, genetic activation of *Stat5* increases IESC regeneration to replenish injured intestinal epithelia, conferring resistance to intestinal inflammation. Mechanistically, activated STAT5 could repress *Bmi1* expression (a quiescent IESC marker). Overall, our work will be beneficial to obtain molecular insights into diseases driven by persistent enteric infection or inflammation.

## EXPERIMENTAL PROCEDURES

### Materials

All chemicals and antibodies used in this work are described in the [Supplemental Experimental Procedures](#).

### Animal Resources and Maintenance

The animal study protocol was approved by the CHRf Institutional Animal Care and Use Committee (IACUC2013-0051 1E03030, Han). All mouse lines used in this work are listed in the [Supplemental Experimental Procedures](#).

### Radiation-Induced Injury Models and Animal Model of Colitis

The radiation-induced injury models and animal model of colitis are described in the [Supplemental Experimental Procedures](#).

### Enteroid Culture and Differentiation

Ileal and jejunal crypts were isolated and IESCs were differentiated in vitro. Tam induction details are summarized in the [Supplemental Experimental Procedures](#).

### Immunoblotting, IF, IH, In Situ Hybridization, and TUNEL Assay

Levels of LGR5, BMI1, LRIG1, DCLK1, *Olfm4*, *Ascl2*, and apoptosis were measured in the tissues and cultured cells. Details are described in the [Supplemental Experimental Procedures](#).

### Flow Cytometry

IEC isolation, LGR5<sup>+</sup> IESC, and EdU FACS analyses are described in the [Supplemental Experimental Procedures](#).



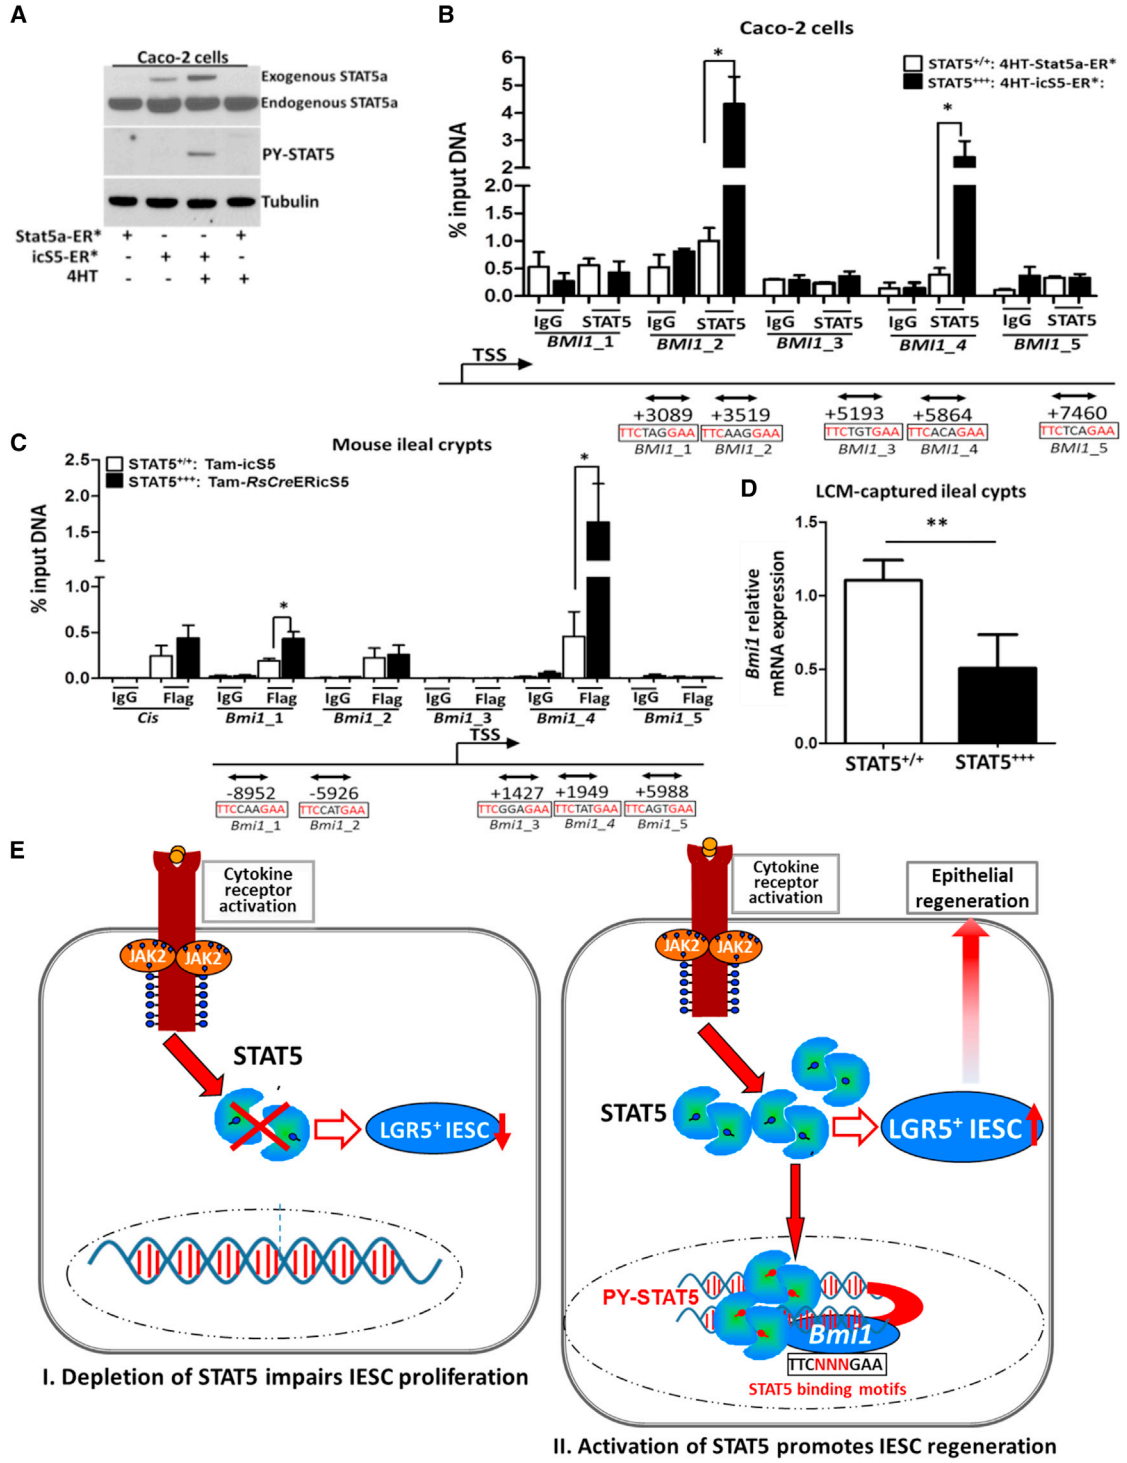

**Figure 7. STAT5 Binds to the *Bmi1* Locus to Repress *Bmi1* Expression**

(A) Subconfluent Caco-2 cells were transduced with lentiviral constructs expressing STAT5a-ER\* or ic55-ER\* variants. Then, 200 nM 4HT was used to induce activation of STAT5 and total proteins were extracted for anti-STAT5a, anti-PY-STAT5, and anti-Tubulin immunoblotting. Data represent three independent experiments.

(B and C) Proteins and DNA complexes from Caco-2 cells or mouse ileal crypts were crosslinked, sheared, and immunoprecipitated.

(legend continued on next page)

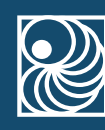

### Laser Capture Microdissection

Details regarding laser capture microdissection are described in the [Supplemental Experimental Procedures](#).

### ChIP Assay and Real-Time qPCR

ChIP analyses are described in the [Supplemental Experimental Procedures](#).

### hESC Maintenance, Lentiviral Transduction of hESCs, and IEC Lines

pMSCV-STAT5a-ER\* and pMSCV-icS5-ER\* were cloned into lentiviral plasmids. The federally approved WA01 (H1) ESCs and Caco-2 cell differentiation are described in the [Supplemental Experimental Procedures](#).

### Statistical Analysis

Results are presented as the mean  $\pm$  SEM. Data were analyzed by one-way ANOVA and two-tailed Student's t test, the Mann-Whitney test (Prism; GraphPad) was used as appropriate, and p values  $\leq 0.05$  were considered significant.

### SUPPLEMENTAL INFORMATION

Supplemental Information includes Supplemental Experimental Procedures, six figures, and three tables and can be found with this article online at <http://dx.doi.org/10.1016/j.stemcr.2014.12.004>.

### AUTHOR CONTRIBUTIONS

X.H., R.M., N.S., M.H., and C.M. conceived and designed the experiments. X.H., S.G., H.N., C.M., Y.L., T.N., J.V., W.T., and D.Z. performed the experiments. X.H., R.M., H.N., T.R., and M.M. generated transgenic mice. X.H., R.M., H.N., C.M., S.G., N.S., A.J., and M.H. analyzed the data. R.M., N.S., T.R., M.M., and M.H. contributed reagents/materials/analysis tools. X.H. and R.M. wrote or contributed to the writing of the manuscript.

### ACKNOWLEDGMENTS

We greatly appreciate Drs. James Wells, Mitchell Cohen, and Lee Denson at Cincinnati Children's Hospital Medical Center (CCHMC) for supporting our research project. We thank Dr. Eilio Casanova at LBI-CR for Cancer for generating icS5 mice, and Dr. Yi Zheng's laboratory for providing mouse lines. We also thank Dr. Maxime Mahe for providing technical support, and the

CCHMC Pluripotent Stem Cell Facility for generating the lentivirus and assisting with hESC cultures. This work was supported by NIAID R21 (AI103388 to X.H.), CDMRP (PR121412 to X.H.), an AGA Elsevier Pilot Research Award (to X.H.), and CCHMC Research Innovation Funding (to X.H.) from CCHMC, and the Cincinnati Children's Hospital Research Foundation Digestive Health Center (PHS grant P30 DK078392). R.M., H.N., M.M., and T.R. were supported by grant SFB F28 from the Austrian Science Funds (FWF). This work was completed in part in the NIH-funded Digestive Health Center and Laser Capture Microdissection Core at CCHMC.

Received: September 10, 2014

Revised: December 4, 2014

Accepted: December 4, 2014

Published: January 8, 2015

### REFERENCES

- Barker, N., van Es, J.H., Kuipers, J., Kujala, P., van den Born, M., Cozijnsen, M., Haegbarth, A., Korving, J., Begthel, H., Peters, P.J., and Clevers, H. (2007). Identification of stem cells in small intestine and colon by marker gene *Lgr5*. *Nature* **449**, 1003–1007.
- Beachy, P.A., Karhadkar, S.S., and Berman, D.M. (2004). Tissue repair and stem cell renewal in carcinogenesis. *Nature* **432**, 324–331.
- Boland, C.R., Luciani, M.G., Gasche, C., and Goel, A. (2005). Infection, inflammation, and gastrointestinal cancer. *Gut* **54**, 1321–1331.
- Buchon, N., Broderick, N.A., Chakrabarti, S., and Lemaitre, B. (2009). Invasive and indigenous microbiota impact intestinal stem cell activity through multiple pathways in *Drosophila*. *Genes Dev.* **23**, 2333–2344.
- Buczacki, S.J., Zecchini, H.I., Nicholson, A.M., Russell, R., Vermeulen, L., Kemp, R., and Winton, D.J. (2013). Intestinal label-retaining cells are secretory precursors expressing *Lgr5*. *Nature* **495**, 65–69.
- Crosnier, C., Stamataki, D., and Lewis, J. (2006). Organizing cell renewal in the intestine: stem cells, signals and combinatorial control. *Nat. Rev. Genet.* **7**, 349–359.
- Farin, H.F., Karthaus, W.R., Kujala, P., Rakhshandehroo, M., Schwank, G., Vries, R.G., Kalkhoven, E., Nieuwenhuis, E.E., and Clevers, H. (2014). Paneth cell extrusion and release of antimicrobial products is directly controlled by immune cell-derived IFN- $\gamma$ . *J. Exp. Med.* **211**, 1393–1405.

(B) Purified DNA from the total input DNA, normal rabbit IgG, or anti-STAT5 immunoprecipitates from Caco-2 cells in three independent experiments were analyzed by qPCR for the human *BMI1* locus.

(C) DNA complexes from ileal crypts were immunoprecipitated with anti-FLAG antibodies and the purified DNA was analyzed for the mouse *Bmi1* locus. Consensus STAT5 binding sites are indicated as lines with double arrows, and positions relative to the *Bmi1* transcription start site (TSS) are shown. Results are expressed as the mean  $\pm$  SEM (n = 4 mice per group; \*p < 0.05).

(D) Ileal frozen sections were prepared from STAT5<sup>+/+</sup> mice. Ileal crypts were captured by laser capture microdissection. *Bmi1* expression was determined by qPCR. Results are expressed as the mean  $\pm$  SEM (n = 5 mice per group; \*\*p < 0.01).

(E) Schematic overview of the role of STAT5 signaling in IESCs. STAT5 LOF impairs IESC proliferation (I), and STAT5 GOF promotes IESC regeneration to repair IEC injury (II).

See also [Figure S6](#) and [Tables S1–S3](#).



- Gilbert, S., Zhang, R., Denson, L., Moriggl, R., Steinbrecher, K., Shroyer, N., Lin, J., and Han, X. (2012). Enterocyte STAT5 promotes mucosal wound healing via suppression of myosin light chain kinase-mediated loss of barrier function and inflammation. *EMBO Mol. Med.* *4*, 109–124.
- Grebien, F., Kerenyi, M.A., Kovacic, B., Kolbe, T., Becker, V., Dolznig, H., Pfeffer, K., Klingmüller, U., Müller, M., Beug, H., et al. (2008). Stat5 activation enables erythropoiesis in the absence of EpoR and Jak2. *Blood* *111*, 4511–4522.
- Han, X., Benight, N., Osuntokun, B., Loesch, K., Frank, S.J., and Denson, L.A. (2007). Tumour necrosis factor alpha blockade induces an anti-inflammatory growth hormone signalling pathway in experimental colitis. *Gut* *56*, 73–81.
- Han, X., Gilbert, S., Groschwitz, K., Hogan, S., Jurickova, I., Trapnell, B., Samson, C., and Gully, J. (2010). Loss of GM-CSF signalling in non-haematopoietic cells increases NSAID ileal injury. *Gut* *59*, 1066–1078.
- Hua, G., Thin, T.H., Feldman, R., Haimovitz-Friedman, A., Clevers, H., Fuks, Z., and Kolesnick, R. (2012). Crypt base columnar stem cells in small intestines of mice are radioresistant. *Gastroenterology* *143*, 1266–1276.
- Jiang, H., Patel, P.H., Kohlmaier, A., Grenley, M.O., McEwen, D.G., and Edgar, B.A. (2009). Cytokine/Jak/Stat signaling mediates regeneration and homeostasis in the *Drosophila* midgut. *Cell* *137*, 1343–1355.
- Ju, S., Mu, J., Dokland, T., Zhuang, X., Wang, Q., Jiang, H., Xiang, X., Deng, Z.B., Wang, B., Zhang, L., et al. (2013). Grape exosome-like nanoparticles induce intestinal stem cells and protect mice from DSS-induced colitis. *Mol. Ther.* *21*, 1345–1357.
- Kato, Y., Iwama, A., Tadokoro, Y., Shimoda, K., Minoguchi, M., Akira, S., Tanaka, M., Miyajima, A., Kitamura, T., and Nakauchi, H. (2005). Selective activation of STAT5 unveils its role in stem cell self-renewal in normal and leukemic hematopoiesis. *J. Exp. Med.* *202*, 169–179.
- Kim, T.H., Escudero, S., and Shivdasani, R.A. (2012). Intact function of Lgr5 receptor-expressing intestinal stem cells in the absence of Paneth cells. *Proc. Natl. Acad. Sci. USA* *109*, 3932–3937.
- Kyba, M., Perlingeiro, R.C., Hoover, R.R., Lu, C.W., Pierce, J., and Daley, G.Q. (2003). Enhanced hematopoietic differentiation of embryonic stem cells conditionally expressing Stat5. *Proc. Natl. Acad. Sci. USA* *100* (Suppl 1), 11904–11910.
- Lee, G., White, L.S., Hurov, K.E., Stappenbeck, T.S., and Piwnicka-Worms, H. (2009). Response of small intestinal epithelial cells to acute disruption of cell division through CDC25 deletion. *Proc. Natl. Acad. Sci. USA* *106*, 4701–4706.
- Li, L., and Clevers, H. (2010). Coexistence of quiescent and active adult stem cells in mammals. *Science* *327*, 542–545.
- Li, Q., Bohin, N., Wen, T., Ng, V., Magee, J., Chen, S.C., Shannon, K., and Morrison, S.J. (2013). Oncogenic Nras has bimodal effects on stem cells that sustainably increase competitiveness. *Nature* *504*, 143–147.
- Lin, G., Xu, N., and Xi, R. (2010). Paracrine unpaired signaling through the JAK/STAT pathway controls self-renewal and lineage differentiation of *Drosophila* intestinal stem cells. *J. Mol. Cell Biol.* *2*, 37–49.
- Merlos-Suárez, A., Barriga, F.M., Jung, P., Iglesias, M., Céspedes, M.V., Rossell, D., Sevillano, M., Hernando-Momblona, X., da Silva-Diz, V., Muñoz, P., et al. (2011). The intestinal stem cell signature identifies colorectal cancer stem cells and predicts disease relapse. *Cell Stem Cell* *8*, 511–524.
- Metcalf, C., Kljavin, N.M., Ybarra, R., and de Sauvage, F.J. (2014). Lgr5+ stem cells are indispensable for radiation-induced intestinal regeneration. *Cell Stem Cell* *14*, 149–159.
- Montgomery, R.K., Carlone, D.L., Richmond, C.A., Farilla, L., Kranendonk, M.E., Henderson, D.E., Baffour-Awuah, N.Y., Ambruzs, D.M., Fogli, L.K., Algra, S., and Breault, D.T. (2011). Mouse telomerase reverse transcriptase (mTert) expression marks slowly cycling intestinal stem cells. *Proc. Natl. Acad. Sci. USA* *108*, 179–184.
- Muyrers, J.P., Zhang, Y., Testa, G., and Stewart, A.F. (1999). Rapid modification of bacterial artificial chromosomes by ET-recombination. *Nucleic Acids Res.* *27*, 1555–1557.
- Pereira, B., Sousa, S., Barros, R., Carreto, L., Oliveira, P., Oliveira, C., Chartier, N.T., Plateroti, M., Rouault, J.P., Freund, J.N., et al. (2013). CDX2 regulation by the RNA-binding protein MEX3A: impact on intestinal differentiation and stemness. *Nucleic Acids Res.* *41*, 3986–3999.
- Potten, C.S. (2004). Radiation, the ideal cytotoxic agent for studying the cell biology of tissues such as the small intestine. *Radiat. Res.* *161*, 123–136.
- Powell, A.E., Wang, Y., Li, Y., Poulin, E.J., Means, A.L., Washington, M.K., Higginbotham, J.N., Juchheim, A., Prasad, N., Levy, S.E., et al. (2012). The pan-ErbB negative regulator Lrig1 is an intestinal stem cell marker that functions as a tumor suppressor. *Cell* *149*, 146–158.
- Sangiorgi, E., and Capecchi, M.R. (2008). Bmi1 is expressed in vivo in intestinal stem cells. *Nat. Genet.* *40*, 915–920.
- Stine, R.R., and Matunis, E.L. (2013). JAK-STAT signaling in stem cells. *Adv. Exp. Med. Biol.* *786*, 247–267.
- Takeda, N., Jain, R., LeBoeuf, M.R., Wang, Q., Lu, M.M., and Epstein, J.A. (2011). Interconversion between intestinal stem cell populations in distinct niches. *Science* *334*, 1420–1424.
- Tian, H., Biehs, B., Warming, S., Leong, K.G., Rangell, L., Klein, O.D., and de Sauvage, F.J. (2011). A reserve stem cell population in small intestine renders Lgr5-positive cells dispensable. *Nature* *478*, 255–259.
- Vafaizadeh, V., Klemmt, P., Brendel, C., Weber, K., Doebele, C., Britt, K., Grez, M., Fehse, B., Desrivières, S., and Groner, B. (2010). Mammary epithelial reconstitution with gene-modified stem cells assigns roles to Stat5 in luminal alveolar cell fate decisions, differentiation, involution, and mammary tumor formation. *Stem Cells* *28*, 928–938.
- van Es, J.H., Sato, T., van de Wetering, M., Lyubimova, A., Nee, A.N., Gregorieff, A., Sasaki, N., Zeinstra, L., van den Born, M., Korving, J., et al. (2012). Dll1+ secretory progenitor cells revert to stem cells upon crypt damage. *Nat. Cell Biol.* *14*, 1099–1104.
- Van Landeghem, L., Santoro, M.A., Krebs, A.E., Mah, A.T., Dehmer, J.J., Gracz, A.D., Scull, B.P., McNaughton, K., Magness, S.T., and Lund, P.K. (2012). Activation of two distinct Sox9-EGFP-expressing intestinal stem cell populations during crypt regeneration after





irradiation. *Am. J. Physiol. Gastrointest. Liver Physiol.* *302*, G1111–G1132.

Wang, Z., Li, G., Tse, W., and Bunting, K.D. (2009). Conditional deletion of STAT5 in adult mouse hematopoietic stem cells causes loss of quiescence and permits efficient nonablative stem cell replacement. *Blood* *113*, 4856–4865.

Westphalen, C.B., Asfaha, S., Hayakawa, Y., Takemoto, Y., Lukin, D.J., Nuber, A.H., Brandtner, A., Setlik, W., Remotti, H., Muley, A., et al. (2014). Long-lived intestinal tuft cells serve as colon cancer-initiating cells. *J. Clin. Invest.* *124*, 1283–1295.

Wierenga, A.T., Vellenga, E., and Schuringa, J.J. (2008). Maximal STAT5-induced proliferation and self-renewal at intermediate STAT5 activity levels. *Mol. Cell. Biol.* *28*, 6668–6680.

Yan, K.S., Chia, L.A., Li, X., Ootani, A., Su, J., Lee, J.Y., Su, N., Luo, Y., Heilshorn, S.C., Amieva, M.R., et al. (2012). The intestinal stem cell markers *Bmi1* and *Lgr5* identify two functionally distinct populations. *Proc. Natl. Acad. Sci. USA* *109*, 466–471.

Yui, S., Nakamura, T., Sato, T., Nemoto, Y., Mizutani, T., Zheng, X., Ichinose, S., Nagaishi, T., Okamoto, R., Tsuchiya, K., et al. (2012). Functional engraftment of colon epithelium expanded in vitro from a single adult *Lgr5*(+) stem cell. *Nat. Med.* *18*, 618–623.

Zhang, N., Yantiss, R.K., Nam, H.S., Chin, Y., Zhou, X.K., Scherl, E.J., Bosworth, B.P., Subbaramaiah, K., Dannenberg, A.J., and Benzra, R. (2014). ID1 is a functional marker for intestinal stem and progenitor cells required for normal response to injury. *Stem Cell Rep.* *3*, 716–724.

**Stem Cell Reports**

**Supplemental Information**

**Activated STAT5 Confers Resistance  
to Intestinal Injury by Increasing Intestinal  
Stem Cell Proliferation and Regeneration**

**Shila Gilbert, Harini Nivarthi, Christopher N. Mayhew, Yuan-Hung Lo, Taeko K. Noah,  
Jefferson Vallance, Thomas Rüllicke, Mathias Müller, Anil G. Jegga, Wenjuan Tang,  
Dongsheng Zhang, Michael Helmrich, Noah Shroyer, Richard Moriggl, and Xiaonan Han**

# Figure S1

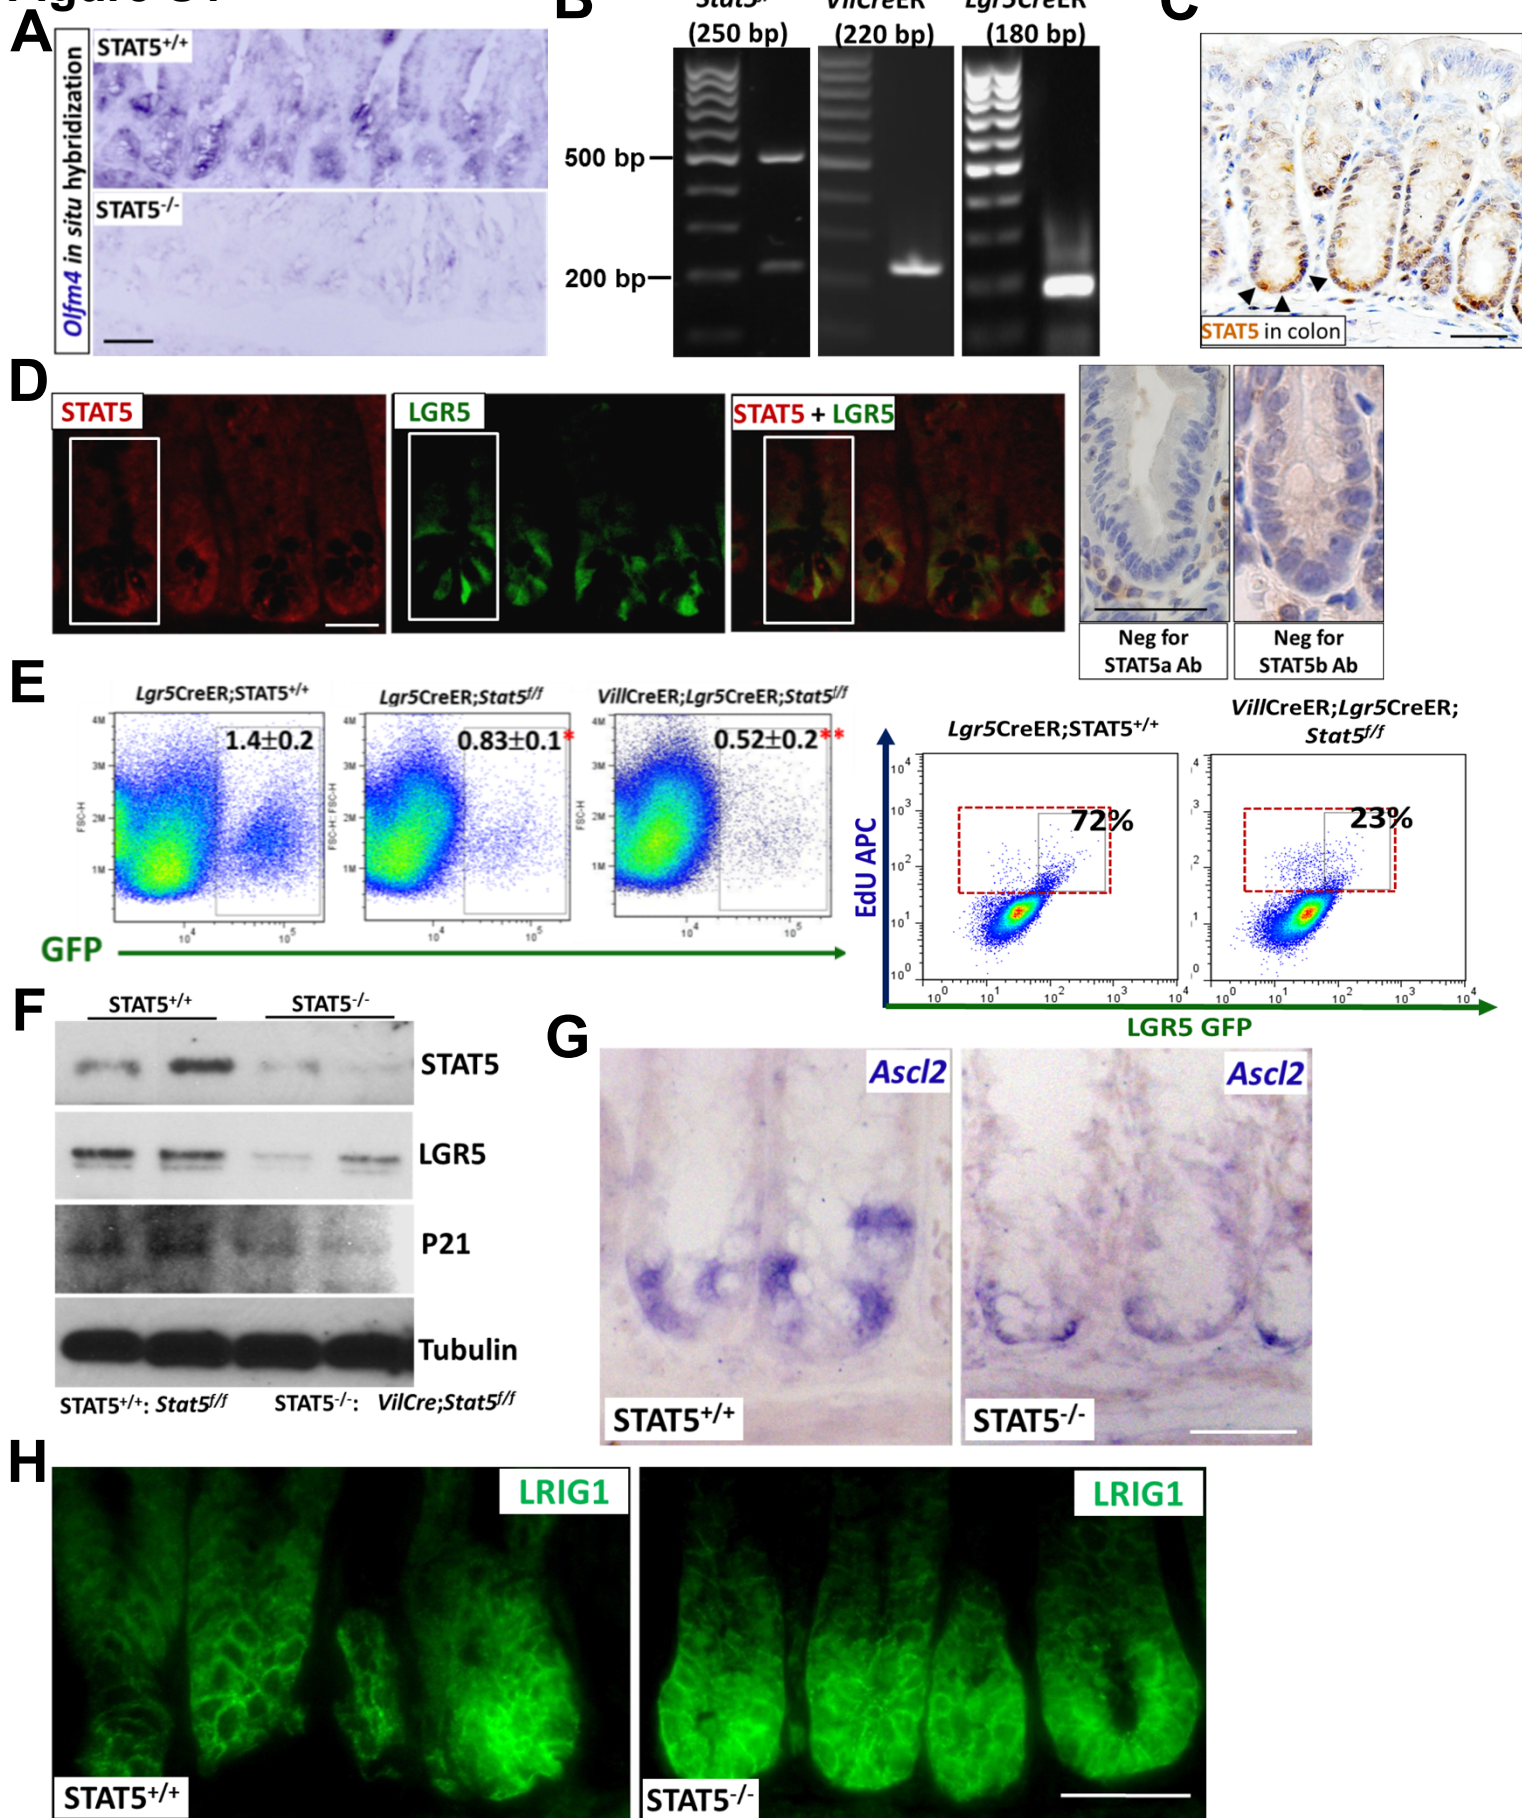



**Figure S1.** Related to Figure 1.

- A) *In situ* hybridization analysis for *Olfm4* in the crypts from  $STAT5^{-/-}$  mice is shown,  $n \geq 4$  mice per group.
- B) Inducible depletion of STAT5 from LGR5<sup>+</sup> IESCs was achieved by breeding *Stat5<sup>ff</sup>* mice with *Lgr5CreER* transgenic mice and *VilCreER<sup>T2</sup>* transgenic mice. PCR genotyping was used to genotype the existence of *Stat5<sup>ff</sup>*, *Lgr5CreER<sup>T2</sup>* and *VilCreER<sup>T2</sup>* in mice.
- C) Colonic STAT5 expression was determined by immunohistochemistry staining (IH), the arrows indicate STAT5 expression at the crypt base. Original magnification  $\times 400$ ,  $n=3$  mice.
- D) Ileal frozen sections from *Lgr5* reporter mice were co-stained with STAT5 (red) and LGR5-GFP (green) in multiple crypts (left panel). Negative controls (Neg) show the staining specificity of STAT5a or STAT5b antibodies by staining STAT5 deficient intestine (right panel). Data represent three independent experiments.
- E) IECs were dissociated. Frequency of LGR5 GFP<sup>+</sup> (left panel) and LGR5 GFP<sup>+</sup>EdU<sup>+</sup> IECs in the EdU<sup>+</sup> IECs (right panel) were measured by FACS. Representative scatter graphs are shown. Results are expressed as the mean  $\pm$  SEM,  $n=4$  or 6 mice per group, \*  $p < 0.05$  and \*\*  $p < 0.01$  vs *Lgr5CreER*;  $STAT5^{+/+}$  mice.
- F) Constitutive IEC-STAT5 deficient ( $STAT5^{-/-}$ ) mice were generated using Cre-mediated recombination to delete *Stat5* locus in colonic IECs. Colonic IECs were isolated from  $STAT5^{+/+}$  and  $STAT5^{-/-}$  mice, STAT5, LGR5, and P21 expression were identified with immunoblotting,  $n=5$  mice per group.
- G) *Ascl2* expression in colonic IECs in  $STAT5^{+/+}$  and  $STAT5^{-/-}$  mice was determined by *In Situ* Hybridization,  $n=4$  mice per group.
- H) LRIG1 in the colonic IECs was identified with immunofluorescence staining,  $n=5$  mice per group.

Scale bars, 50  $\mu$ m.

Figure S2

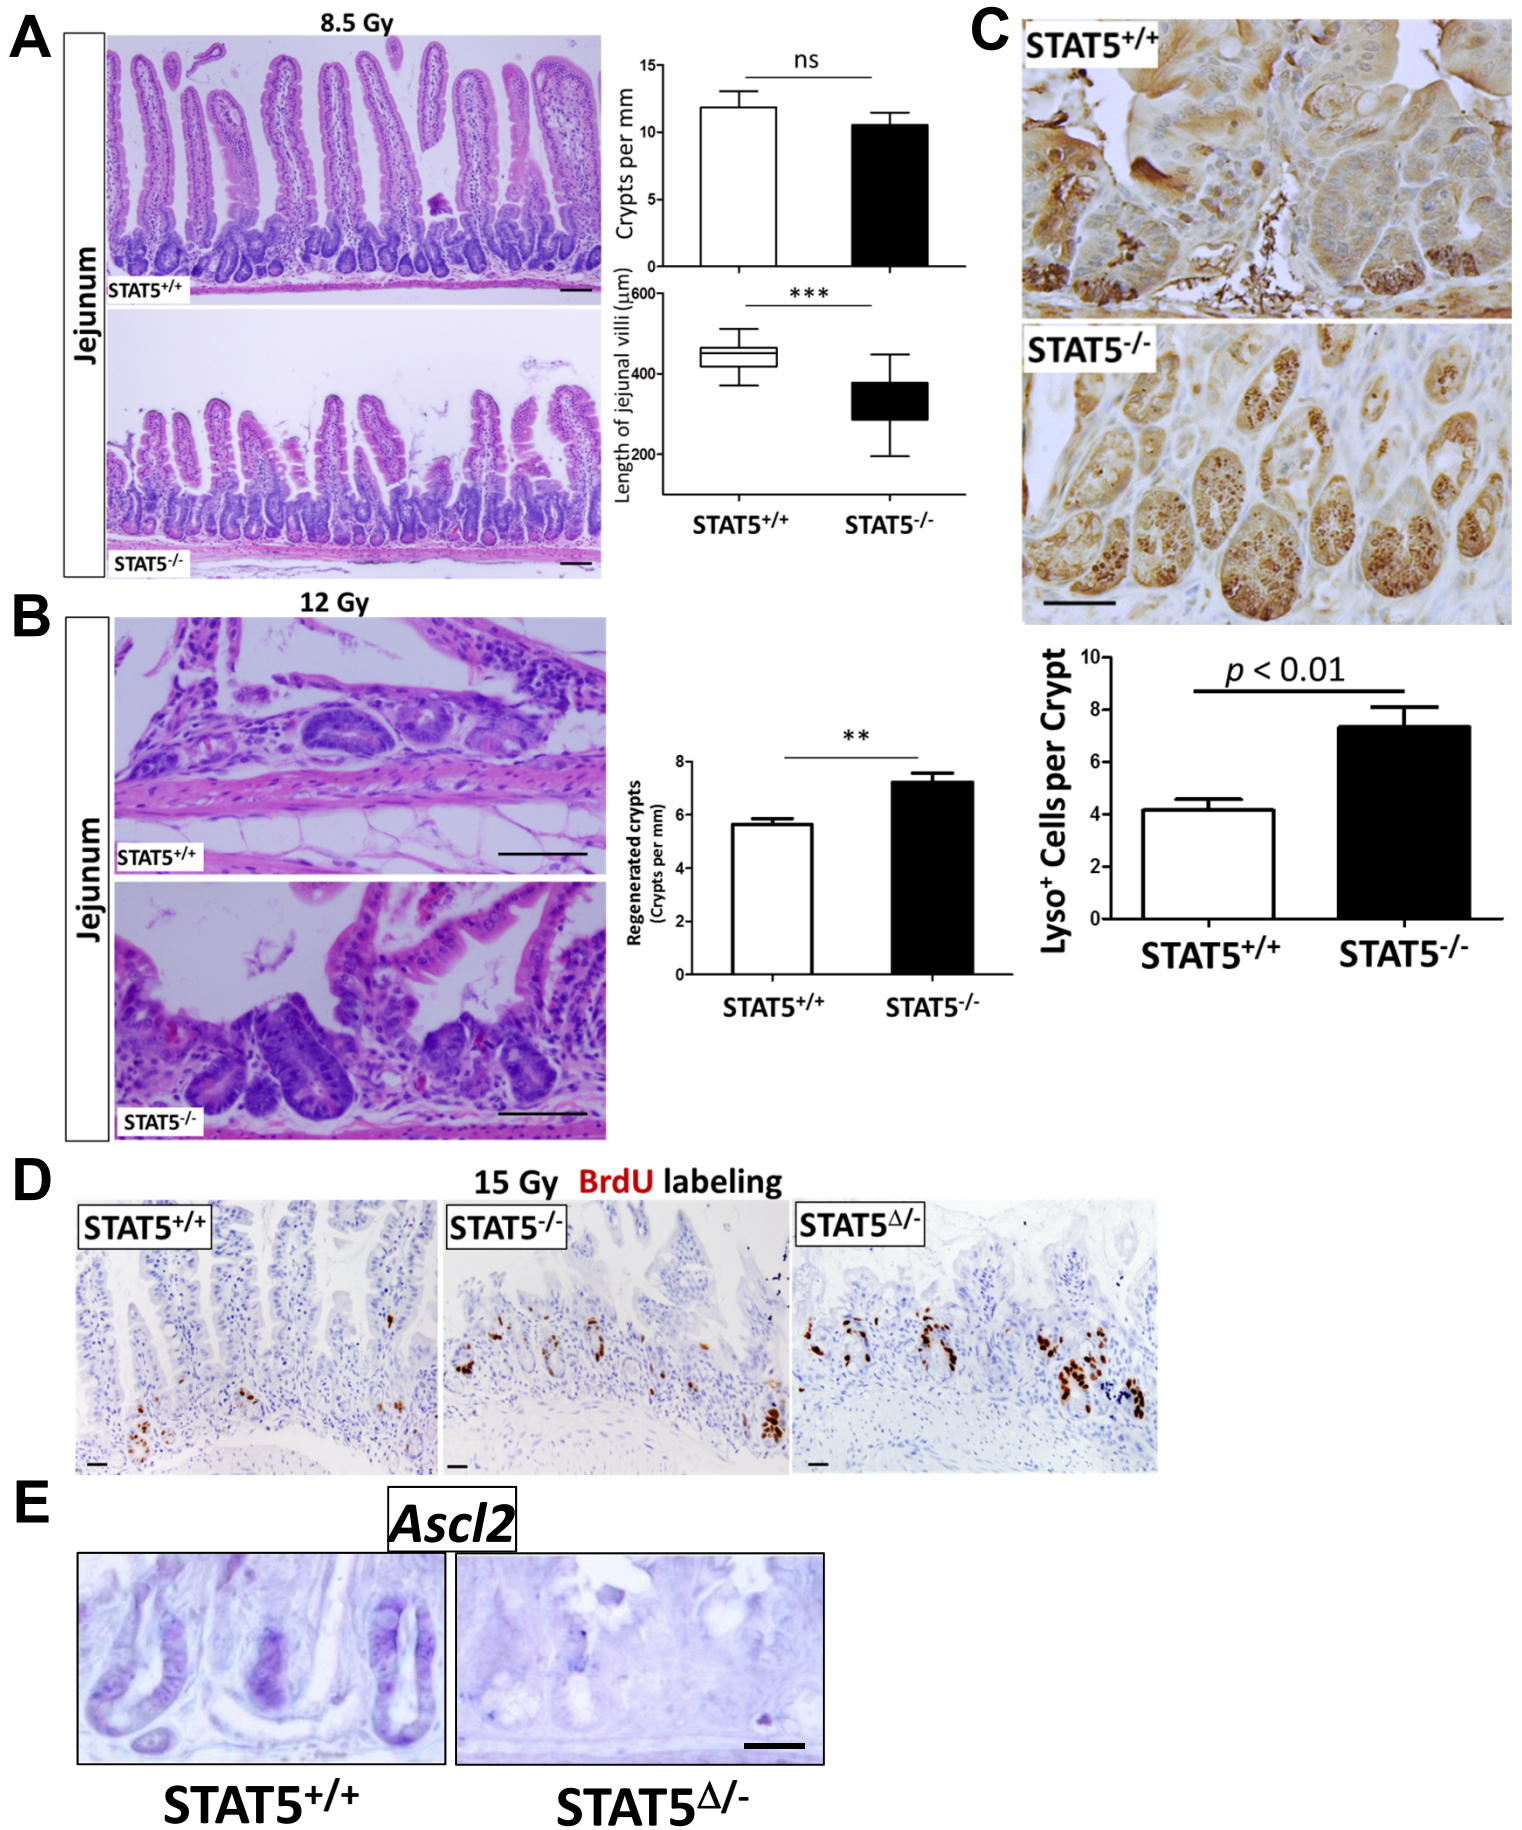

**Figure S2.** Related to Figure 2.

A,B) STAT5<sup>-/-</sup> or STAT5<sup>+/+</sup> mice were exposed to  $\gamma$ -radiation (8.5 or 12 Gy). Jejunal crypt proliferation and length of villi were determined after 3.5 day-recovery following an initial 8.5-Gy irradiation (A) or crypt regeneration was determined after 3.5 day-recovery following 12-Gy irradiation (B). Results are expressed as the mean  $\pm$  SEM, n=6 mice per group, \*\* p < 0.01. Whiskers represent minimum and maximum values.

C) Paneth cells were immunostained with Lysozyme. Lysozyme<sup>+</sup> Paneth cells were counted in both properly oriented and distorted crypts. The results were expressed as Lysozyme<sup>+</sup> cells per crypt, n=5 mice per group. Original magnification  $\times$  200.

D) STAT5<sup>-/-</sup> or STAT5 <sup>$\Delta$ /-</sup> mice were respectively exposed to 15 Gy radiation. 3.5 days post-radiation, these mice were administered with BrdU and sacrificed 3 hours later.

Representative images of BrdU incorporation are shown, n=5 mice per group.

E) *In situ* hybridization analysis for *Ascl2* in the crypts from irradiated STAT5<sup>+/+</sup> and STAT5 <sup>$\Delta$ /-</sup> mice is shown, n=4 mice per group.

Scale bars, 50  $\mu$ m.



Figure S3

A

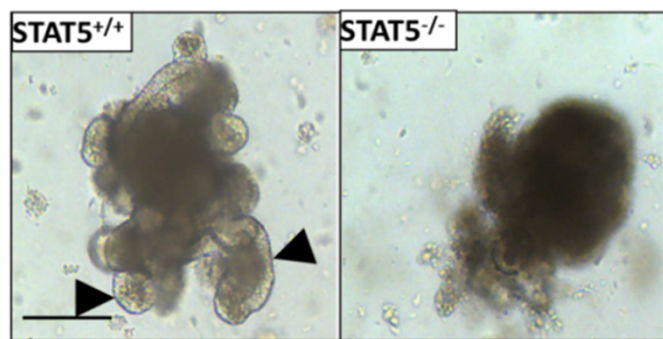

7 days

B

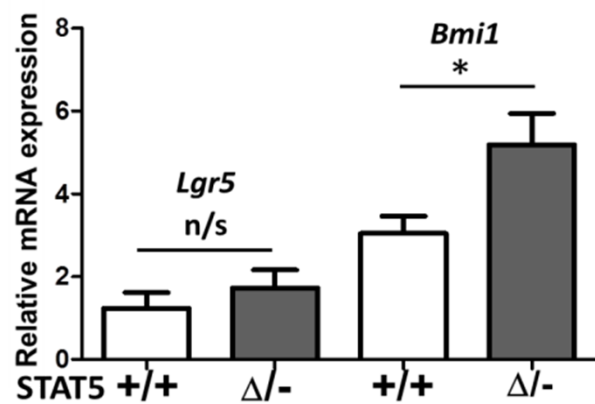

**Figure S3.** Related to Figure 3.

- A) Ileal crypts were isolated from  $STAT5^{-/-}$  or  $STAT5^{+/+}$  mice, and resuspended in matrigel with EGF, Noggin and R-spondin to culture them for 7 days. Representative images are shown. Data are representatives of three independent experiments. Scale bars, 100  $\mu\text{m}$ .
- B) RNA was extracted from 7 day-old enteroids, *Lgr5* and *Bmi1* mRNA levels were determined by qPCR. Results are expressed as the mean  $\pm$  SEM, n=5 mice per group, \* p<0.05.

**Figure S4**

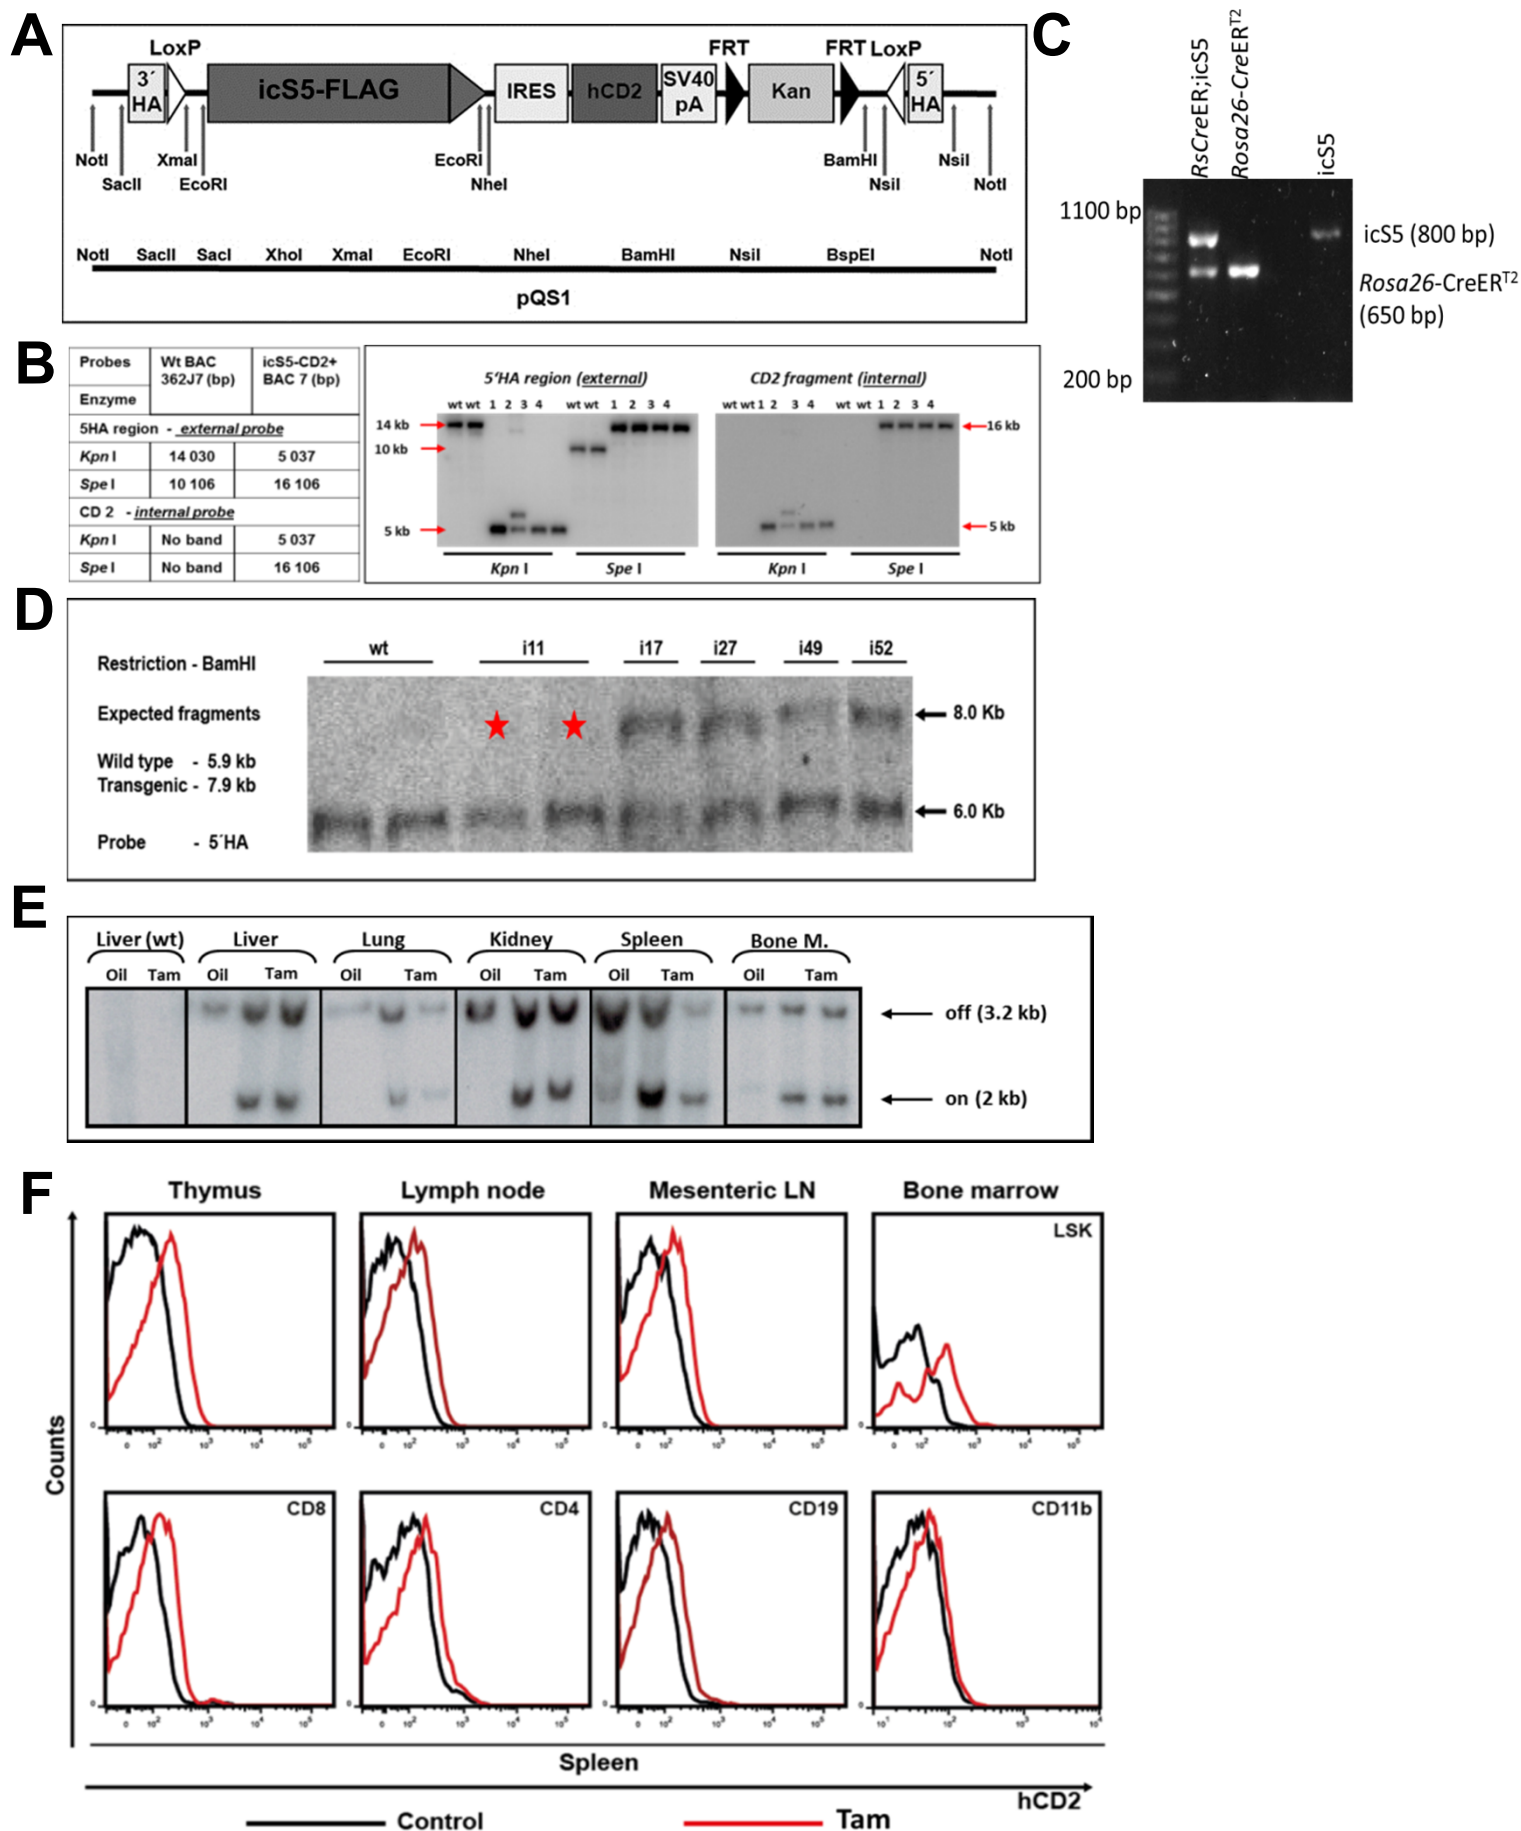



**Figure S4.** Related to Figure 4.

- A) Schematic diagram of icS5-IRES-hCD2 construct. This plasmid was used to introduce the icS5-IRES-hCD2 sequence into the wild type BAC, by homologous recombination using the 5'HA and 3'HA sequences, in an orientation opposite to the transcriptional direction.
- B) 2 bacterial colonies with wild type BAC and 4 colonies with recombinant BAC were digested with two different enzymes (KpnI and SpeI). Southern blotting was used to confirm BAC recombination. The membranes were probed with radioactively labeled probes against the 5' homologous arm region and hCD2 region. Fragments of expected size were seen, confirming the recombined BAC constructs with the icS5-IRES-hCD2 sequence.
- C) Generation of transgenic mice with inducible activation of STAT5. Genotypes of *Rosa26-CreER<sup>T2</sup>*, icS5 and *RsCreER*;icS5 mice were determined by PCR.
- D) Southern blot analysis of icS5 transgenic mice. Southern blot was performed with the tail DNA from icS5 transgenic mice. 5'HA sequence was used as probe. Fragments of expected size of the endogenous locus were seen in all mice but not i11 (see red star labels). These analyses suggest that only a piece of the BAC has integrated in this mouse. Intensity of the endogenous and transgenic bands suggests a low copy number (one up to two copies) in all four mice.
- E) Genomic recombination of icS5 constructs. Upon treatment of *RsCreER*;icS5 mice with Tam, recombination of the genomic locus was seen in different organs, as detected by Southern blotting. n=3 mice per group.
- F) hCD2 expression upon induction of *RsCreER*;icS5 mice. FACS analysis of the cells showed low levels, but consistent expression of hCD2 transgene in the different hematopoietic organs: spleen, thymus, lymph nodes, mesenteric lymph nodes and bone marrow. The black line represents hCD2 expression in control mice while the red line represents hCD2 in Tam-induced mice. In spleen, hCD2 was detected in T-cells (CD4<sup>+</sup> and CD8<sup>+</sup>) and B cells (CD19<sup>+</sup>). However, no expression was seen in myeloid cells (CD11b<sup>+</sup>). In the bone marrow, hCD2 expression can be seen in the early progenitor (LSK) cells after Tam induction, n=3 mice per group.

**Figure S5**

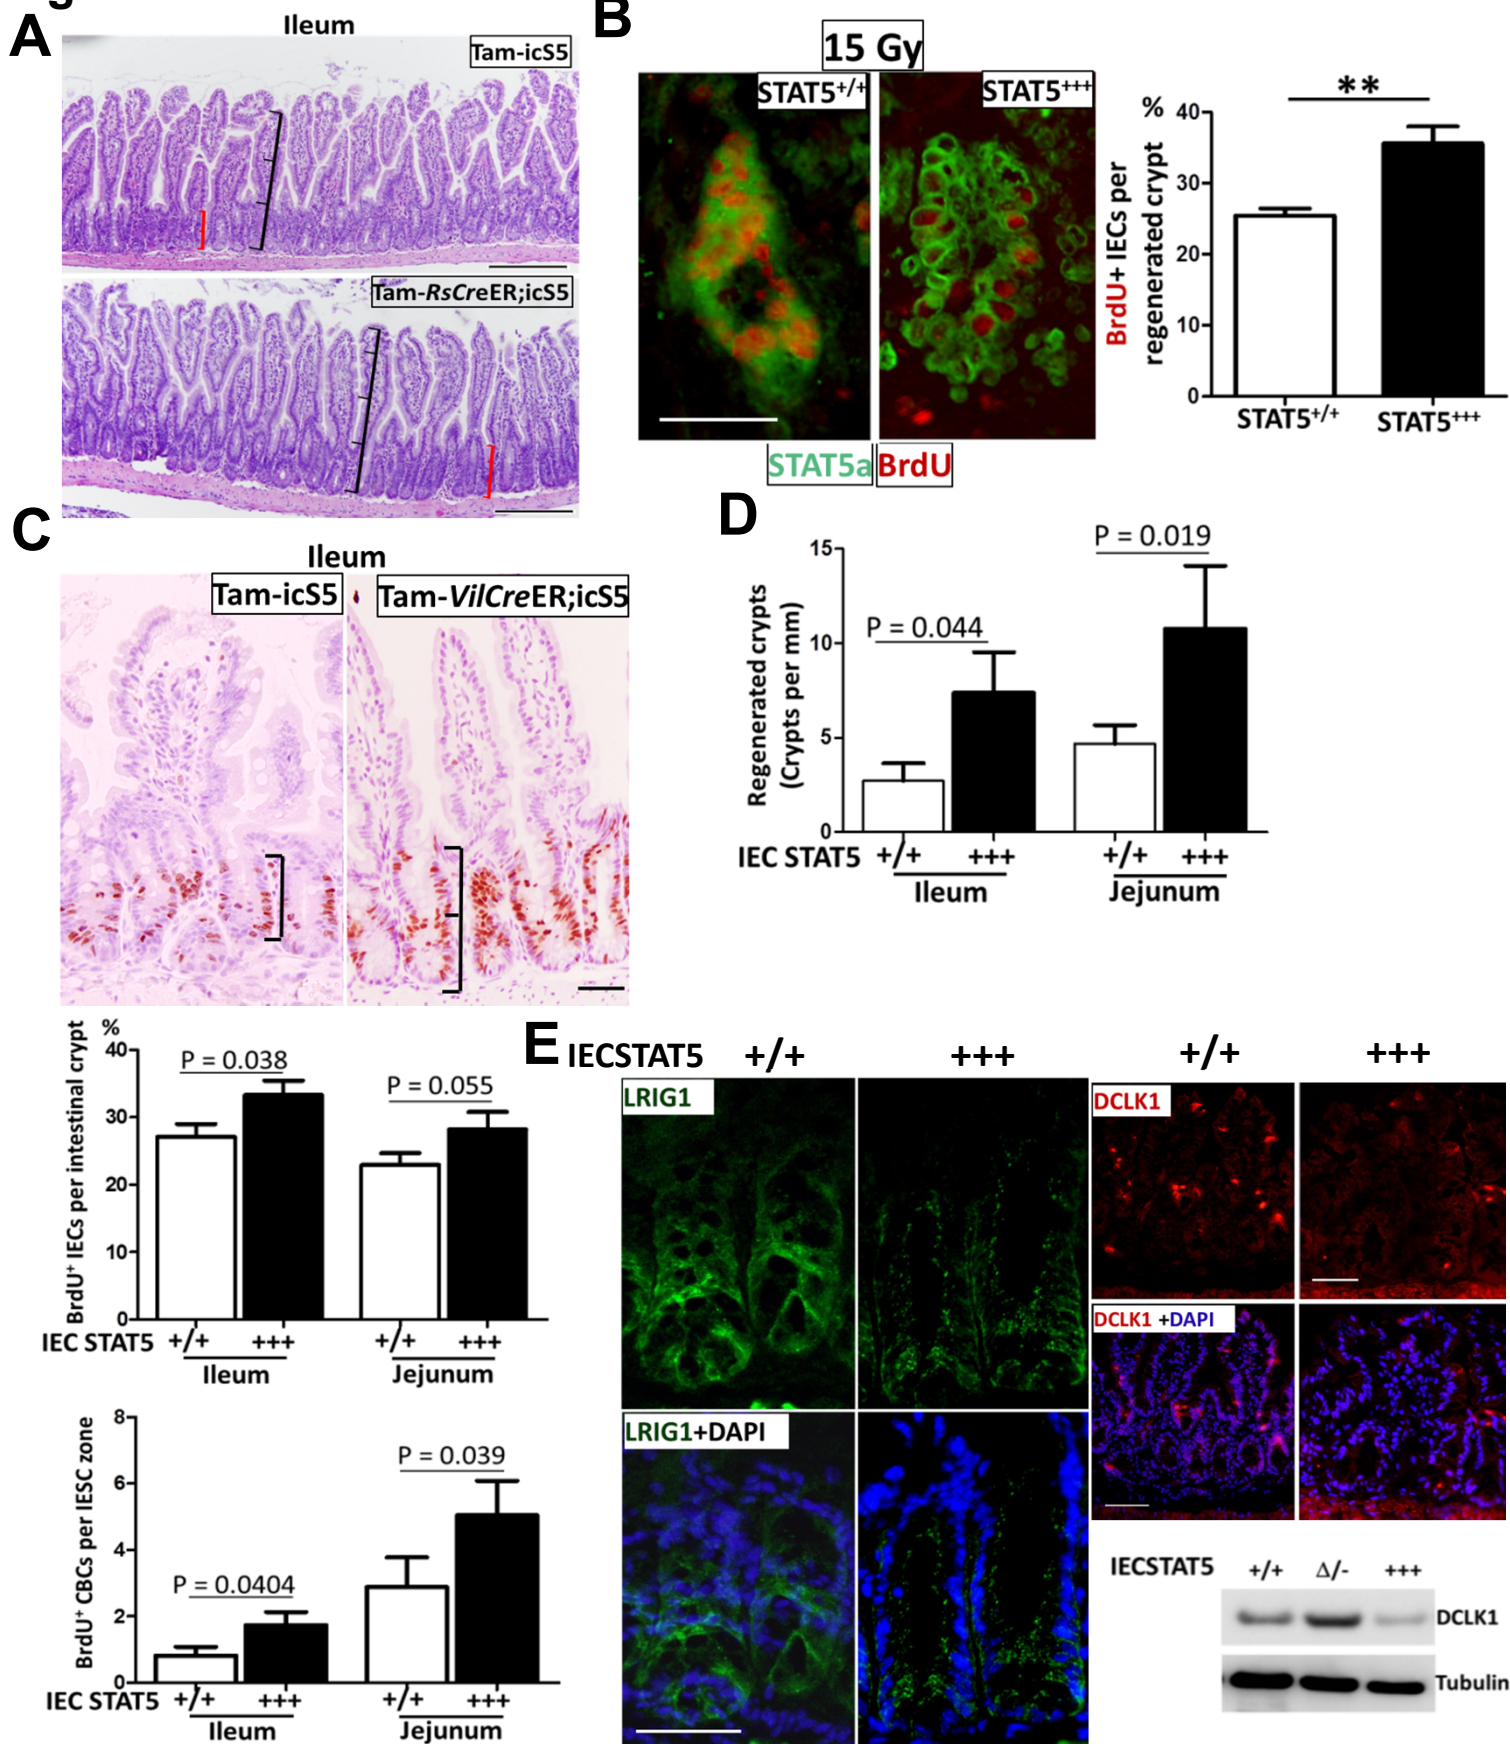

**Figure S5.** Related to Figure 4.

- A) Hematoxylin and Eosin staining (HE) with ileal tissues shows that the villi in Tam-*RsCreER;icS5* mice are significantly elongated compared to Tam-*icS5* mice. Original magnification  $\times 100$ , scales represent ileal villus (black) or crypt (red) length.
- B) *STAT5<sup>+/+</sup>* and *STAT5<sup>+/+</sup>* mice were exposed to the  $\gamma$ -radiation. 3.5 days after an initial 15-Gy radiation, ileal regenerated crypts were double-stained with STAT5a (green) and BrdU (red) IF. The representative images were shown, n=6 mice per group. Percentages of proliferative IECs in the regenerated crypt were measured by BrdU incorporation. Results are expressed as the mean  $\pm$  SEM (n=5 mice per group), \*\* p < 0.01.
- C) *icS5* mice were crossed with *VilCreER<sup>T2</sup>* (*VilCreER;icS5*). *STAT5* was activated by 5-day Tam induction. IEC or CBC proliferation was quantified by *in situ* BrdU labeling, and is respectively expressed as BrdU<sup>+</sup> IECs per crypt or BrdU<sup>+</sup> IESC per stem cell zone. Results are expressed as the mean  $\pm$  SEM (n=4 or 5 mice per group).
- D) *VilCreER;icS5* and *icS5* mice were exposed to the  $\gamma$ -radiation. 3.5 day after an initial 15 Gy radiation, crypt regeneration was determined. Results are expressed as the mean  $\pm$  SEM (n=5 mice per group).
- E) Ileal frozen sections from *STAT5<sup>+/+</sup>* and *VilCreER;icS5* mice were immunostained with anti-LRIG1 (green), DCLK1 (red), and DAPI (Blue), n $\geq$ 5 mice per group. Ileal IECs were isolated from *STAT5<sup>+/+</sup>*, *VilCreER;Stat5<sup>ff</sup>* and *VilCreER;icS5* mice. DCLK1 protein expression was identified with immunoblotting (n=3 mice per group).

Scale bars, 50  $\mu$ m.



Figure S6

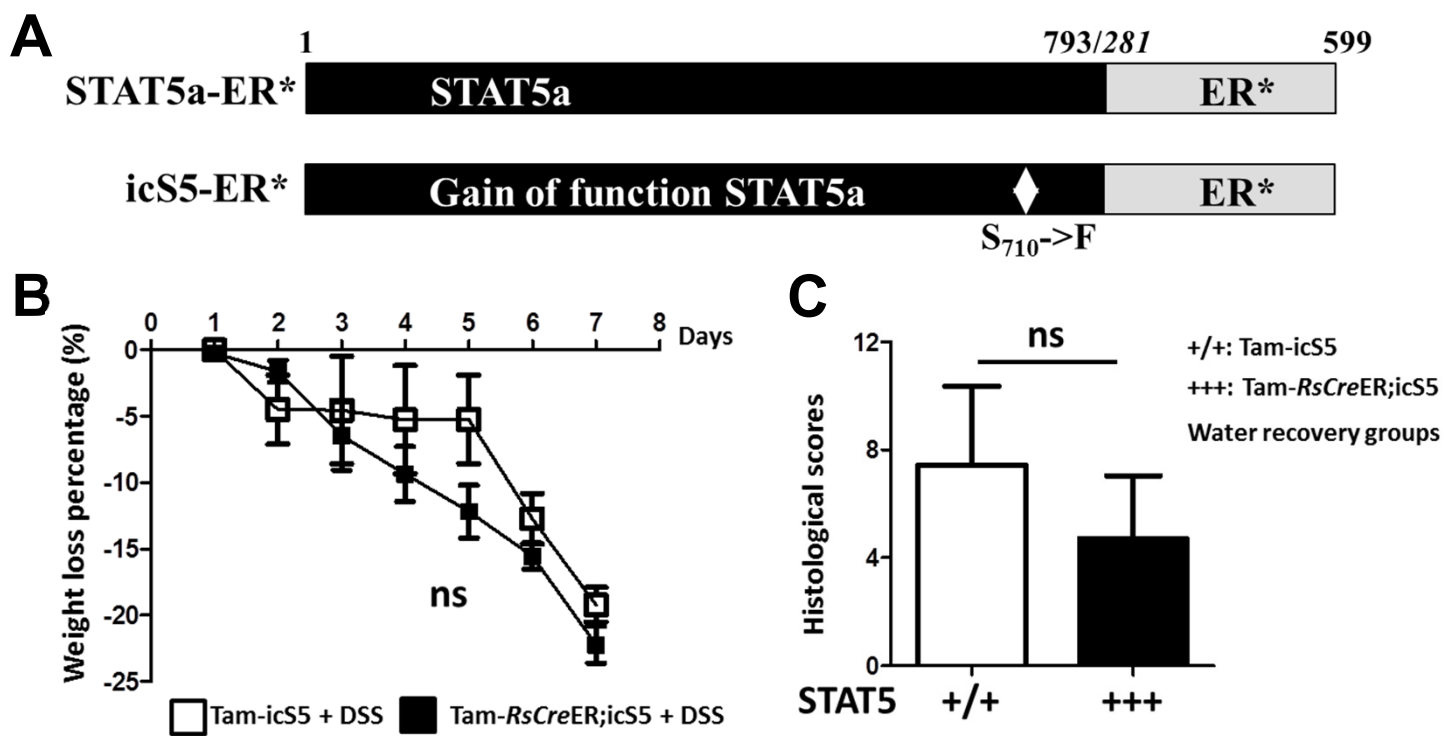

**Figure S6.** Related to Figure 5 and Figure 7.

- A) Structures of wild type STAT5a and constitutively active mutant of STAT5a (icS5) constructs. The GOF STAT5a in Ser710/Phe (icS5) mutation causes enhanced and prolonged tyrosine phosphorylation in a Tam dose dependent fashion.
- B) Acute colonic inflammation was induced by 3% DSS for 7 days in Tam-induced icS5 or *RsCreER;icS5* mice. Percentage of weight loss was measured daily. Results are expressed as the mean  $\pm$  SEM, n=6 mice per group, ns=non-significant
- C) Tam-induced icS5 or *RsCreER;icS5* mice were orally administered with 3% DSS for 5 days followed by 5 day water recovery. Colonic inflammation was scored, results are expressed as the mean  $\pm$  SEM, n=6 or 8 mice per group.

**Supplemental Tables**

**Table S1**

**A**

| Putative STAT5 binding sites in the human <i>BMII</i> locus (consensus: TTCNNGAA) | Position relative to TSS |
|-----------------------------------------------------------------------------------|--------------------------|
| TTCTAGGAA                                                                         | +3089                    |
| TTCAAGGAA                                                                         | +3519                    |
| TTCTGTGAA                                                                         | +5193                    |
| TTCACAGAA                                                                         | +5864                    |
| TTCTCAGAA                                                                         | +7460                    |
| TTCTTGAA                                                                          | +8553                    |

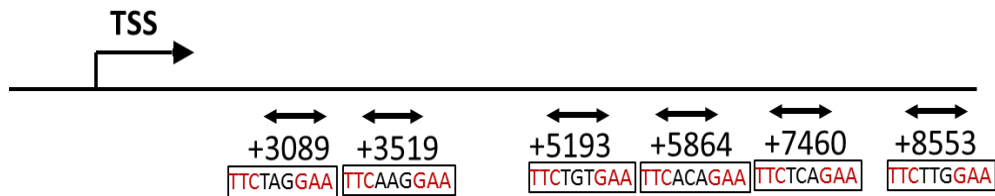

**B**

| Primers        | Sequences                                                  |
|----------------|------------------------------------------------------------|
| <i>BMII</i> _1 | 5'-TGGAGCCCCTTCATGAACTT-3'<br>5'-GCACGGAGGAGTTGTAGGTA-3'   |
| <i>BMII</i> _2 | 5'-CAGCCATTGAGCTGTGTTGA-3'<br>5'-CCGACAGTCAGGGAAGTCAA-3'   |
| <i>BMII</i> _3 | 5'-GCCCAGCTGTACAGTGTTAA-3'<br>5'-TCAGGTGGGGATTTAGCTCA-3'   |
| <i>BMII</i> _4 | 5'-TGTTTCGTTACCTGGAGACCA-3'<br>5'-TAAACGGCTACCCTCCACAA-3'  |
| <i>BMII</i> _5 | 5'-TGTTTGGATCTGAGTTCGTGTG-3'<br>5'-AGGAGATCGCATCGTTTCCT-3' |

**Table S1**

A) Putative STAT5 binding sites in the human *BMI1* locus (consensus: TTCNNNGAA).

Positions relative to the TSS of *BMI1* are shown.

B) Primer sequences of putative STAT5 binding sites in the human *BMI1* locus.



**Table S2**

**A**

| PutativeSTAT5 binding sites in the mouse <i>Bmi1</i> locus<br>(consensus: TTCNNGAA) | Position relative to TSS |
|-------------------------------------------------------------------------------------|--------------------------|
| TTCCAAGAA                                                                           | -8952                    |
| TTCCATGAA                                                                           | -5926                    |
| TTCGGAGAA                                                                           | +1427                    |
| TTCTATGAA                                                                           | +1949                    |
| TTCAGTGAA                                                                           | +5899                    |
| TTCTGAGAA                                                                           | +7675                    |

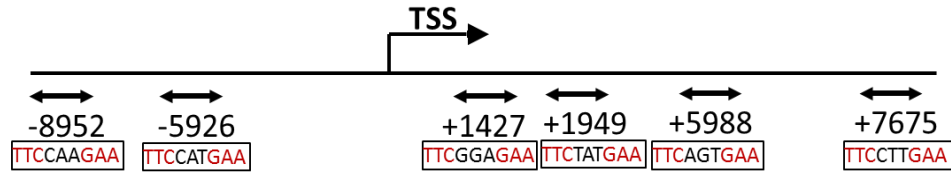

**B**

| Primers       | Sequences                                                  |
|---------------|------------------------------------------------------------|
| <i>Cis</i>    | 5'-GTCCAAAGCACTAGACGCCTG-3'<br>5'-TTCCCGGAAGCCTCATCTT-3'   |
| <i>Bmi1_1</i> | 5'-CGACCATCTCCTGACCATCA-3'<br>5'-AAGAATGGGCTGGATCCTGG-3'   |
| <i>Bmi1_2</i> | 5'-AAGCAGAGAAGTAGGGGTGG-3'<br>5'-GCACGTTGTCACATTGGACA-3'   |
| <i>Bmi1_3</i> | 5'-CCACTCTCACCCCTCCTTTT-3'<br>5'-AAGCTCTGGGGAAACGATCA-3'   |
| <i>Bmi1_4</i> | 5'-TGGGTCCTAAGTACACTAGGGA-3'<br>5'-TGATGGGGAGAACTTTGCCT-3' |
| <i>Bmi1_5</i> | 5'-GCATGCCTACCCAAACCTTAG-3'<br>5'-GACGGGTGAGCTGCATAAAA-3'  |

**Table S2**

- A) Putative STAT5 binding sites in the mouse *Bmi1* locus (consensus: TTCNNNGAA).
- B) Primer sequences of putative STAT5 binding sites in the mouse *Bmi1* locus. Positions relative to the TSS of *Bmi1* are shown.

**Table S3**

| <b>Primers for qPCR</b> | <b>Sequences</b>                                             |
|-------------------------|--------------------------------------------------------------|
| <i>Lgr5</i>             | 5'-CGGAGGAAGCGCTACAGAAT-3'<br>5'-CTGGGTGGCACGTAGCTGAT-3'     |
| <i>Bmi1</i>             | 5'-GGGCTTTTCAAAAATGAGATGAA-3'<br>5'-GAGCCATTGGCAGCATCAG-3'   |
| <i>GAPDH</i>            | 5'-GGTGGGTGGTCCAAGGTTTC-3'<br>5'-TGGTTTGACAATGAATACGGCTAC-3' |

**Table S3**

Primer sequences for real time PCR of mRNA transcripts analyzed.

## Supplemental Experimental Procedures

**Materials.** All chemicals were purchased from Sigma-Aldrich (St. Louis, MO) unless otherwise noted. Antibodies specific for BMI1 (Cat # 5856) and tyrosine phosphorylation specific STAT5 antibodies (PY-STAT5, Cat # 4322) used for immunohistochemistry staining were purchased from Cell Signaling Technology (Boston, MA), antibodies specific for LGR5 from OriGene (Cat # TA503316, Rockville, MD), antibodies specific for LRIG1 from R&D (Cat # AF3688, Minneapolis, MN), antibodies specific for Lysozyme (Cat # A0099) and Ki67 (Cat # M7249) from Dako (Carpinteria, CA), antibodies specific for GFP (Cat # ab13970) and DCLK1 (Cat # ab31704) from Abcam (Cambridge, MA), antibodies specific for STAT5a (Cat # 71-2400) and STAT5b (Cat # 71-2500) from Zymed Laboratories (Life Technologies, Grand Island, NY), and antibodies specific for total STAT5 (Cat # sc-835) and  $\beta$ -tubulin (Cat # sc-9104) from Santa Cruz Biotechnology (Santa Cruz, CA). Tyrosine phosphorylation specific STAT5 antibody (Tyr642/699) used for immunoblotting was from Upstate Biotechnology (Cat # 05-495, Lake Placid, NY). For stem cell culture, matrigel was purchased from BD Biosciences (San Jose, CA), and EGF, Noggin and R-spondin were from R&D, advanced DMEM/F12 media were from Life Technologies, and mTeSR1 media were from STEMCELL Technologies (Vancouver, Canada). For lentiviral transduction reagents, pLENTI-PGK-Puro-DEST (w529-2) plasmids were from Addgene (Cambridge, MA), iProof High-Fidelity DNA Polymerase was from Life Science Research (Hercules, CA) and pENTR/D-TOPO cloning kit from Life Technologies (Grand Island, NY). CHIP kit for human cells was from Upstate Biotechnology (Lake Placid, NY). Anti-FLAG antibodies for mouse CHIP assay were from Sigma and Dynabeads Protein G from Life Technologies. Normal mouse IgG was purchased from Millipore (Billerica, MA). BrdU *in situ* detection kit was purchased from BD Biosciences. TUNEL *in situ* apoptotic detection kit was



from Millipore. Click-iT EdU Alexa Fluor® 647 FACS and Imaging Kits were purchased from Life Technologies.

**Animal resources and maintenance:** The animal study protocol has been approved by the CHRF Institutional Animal Care and Use Committee (IACUC, 1E03030). Breeding pairs for transgenic mice with icS5 mice (icS5) and *Rosa26-CreER*<sup>T2</sup> were obtained from Dr. Moriggl at LBI-CR, Vienna, Austria. Breeding pairs of *Stat5*<sup>ff</sup> were from Dr. Hennighausen at NIDDK (Cui et al., 2004). *Villin-CreER*<sup>T2</sup> mice were obtained from Dr. Zheng at CCHMC (Melendez et al., 2013). LGR5 reporter mice (*Lgr5-EGFP-IRES-CreER*<sup>T2</sup>) mice were from Dr. Shroyer at CCHMC (Barker et al., 2007; Yan et al., 2012). C57BL/6 and *Villin-Cre* transgenic mice were ordered from Jackson Labs (Bar Harbor, MA). Constitutive or inducible depletion of STAT5 from intestinal epithelia was achieved by breeding *Stat5*<sup>ff</sup> mice with *Villin-Cre* or *Villin-CreER*<sup>T2</sup> transgenic mice (el Marjou et al., 2004); inducible hyper-activation of STAT5 was generated by breeding icS5 mice with *Rosa26-CreER*<sup>T2</sup> or *Villin-CreER*<sup>T2</sup> transgenic mice (Hameyer et al., 2007). The effects of inducible depletion of STAT5 upon LGR5<sup>+</sup> IESCs were investigated through crossing *Stat5*<sup>ff</sup> mice with *Lgr5-eGFP-IRES-CreER*<sup>T2</sup> and *Villin-CreER*<sup>T2</sup> mice, by which Tam induction can efficiently deplete STAT5 in LGR5<sup>+</sup> IESCs (Kim et al., 2012) (Figure S1B). All mice used in these studies have been backcrossed with C57BL/6 for more than ten generations and were re-genotyped with respect to STAT5 and Cre prior to necropsy. All studies were performed with littermate *Stat5*<sup>ff</sup> or icS5 mice designated as wild-type controls, *Stat5*<sup>ff</sup> mice with *Villin-Cre* or *Villin-CreER*<sup>T2</sup> denoted as *VilCre;Stat5*<sup>ff</sup> or *VilCreER;Stat5*<sup>ff</sup> mice, and icS5 mice with *Rosa26-creER*<sup>T2</sup> or *Villin-CreER*<sup>T2</sup> mice denoted as *RsCreER;icS5* or *VilCreER;icS5* mice were maintained in specific pathogen free (SPF) conditions in the Children's Hospital Research Foundation (CHRF) and CCHMC Animal Care Facility.

**Radiation-induced injury models.** Eight-week old knockout or transgenic mice were exposed to 8.5, 12 or 15 Gy whole body  $\gamma$ -radiation for 10 minutes at Comprehensive Mouse and Cancer Core, CCHMC (Hua et al., 2012). 3.5 day post-radiation, the mice were intraperitoneally administered with BrdU or EdU and then euthanized three hours later. The intestinal tissues were inspected for gross and histological abnormalities (Han et al., 2010; Hua et al., 2012). Radiation Injury Scores (RIS) and mucosal ulceration of radiation-induced intestinal mucositis were determined as published (Akpolat et al., 2009). RIS is a composite histopathologic scoring system that was extensively improved by our laboratory. Briefly, Scores of  $\gamma$ -radiation-induced ileal mucosal damage (scores: 1, 2 and 3), crypt loss (scores: 1, 2 and 3), mucosal ulcerations (scores: 1, 2 and 3), and thickening of intestinal wall (scores: 1, 2 and 3) were combined as RIS. Numbers of proliferating crypts or regenerated crypts (“microcolonies”) were quantified as crypts per mm under microscope (magnification 100  $\times$ ) and were confirmed by BrdU labeling.

**Animal model of colitis.** Intestinal inflammation was induced by providing transgenic or control littermate mice with 3% dextran sulphate sodium (DSS) water (m.w. 36,000–50,000; MP Biomedicals) for either 7 days for acute injury studies or 5 days followed by 5 days of water for healing studies. Mice were sacrificed three hours after BrdU administration; the colon was removed. Scoring parameters included quantitation of the area of middle and distal colon involved, edema, erosion/ulceration of the epithelial monolayer, crypt loss/damage and infiltration of immune cells into the mucosa. Total disease score was expressed as the mean of all combined scores per genotype (Gilbert et al., 2012).

**Enteroid culture and differentiation.** Mouse crypt-derived enteroids are used as a model to study IESC proliferation and differentiation (Sato et al., 2009). Jejunal and ileal crypts were isolated from *Stat5<sup>ff</sup>*, *VilCreER;Stat5<sup>ff</sup>*, *VilCreER;Lgr5CreER;Stat5<sup>ff</sup>*, *RsCreER;icS5*, and

*RsCreER;Lgr5CreER;icS5* mice, and then dissociated with Chelation Buffer (1 mM EDTA, 5 mM EGTA, 0.5 mM DTT, 43.3 mM Sucrose, and 54.9 mM Sorbitol). The crypts are filtered and re-suspended in Matrigel with 50 ng/ml EGF, 100 ng/ml Noggin, and 500ng/mL R-spondin. IESCs were *in vitro* differentiated from day 1 to day 14 as published (Sato et al., 2009; Spence et al., 2011). Different doses of 4-hydroxy-tamoxifen (200 nM or 1  $\mu$ M, 4HT) were used to induce STAT5 activation or depletion in the mouse enteroids. Stem cell dividing process was imaged and recorded with an inverted microscope (Olympus TH4-100, Japan). Enteroids were cultured in six parallel wells per mouse for each experiment ( $n \geq 4$  mice per group). The number of crypt buds from a minimum of 10 enteroids per well was determined and expressed graphically as the number of crypt buds *vs.* time.

**Immunoblotting, Immunofluorescence, Immunohistochemistry, *In Situ* Hybridization (*In Situ*), and TUNEL assay.** Isolated colonic and ileal IECs, and mucosal tissue were saved. Total cellular protein (TP), cytosolic protein (CE) and nuclear protein (NE) extracts were prepared using cold RIPA buffer and the NE-PER kit per the manufacturers' recommendations (Pierce, Rockford, IL). Expression of LGR5, BMI1, LRIG1, DCLK1, and CYCLIN D1 were measured in TP. The nuclear abundance of PY-STAT5 (Upstate Biotechnology) and STAT5a were detected in NE (Gilbert et al., 2012). Frozen tissue sections from mouse ileum and colon (4  $\mu$ m) were prefixed in paraformaldehyde. Tissue sections were labeled with LRIG1 (Wong et al., 2012), DCLK1, BMI1 (Munoz et al., 2012), and Lysozyme antibodies following FITC-conjugated or TRITC-conjugated anti-rabbit secondary antibodies, 4,6-diamidino-2-phenylindole dihydrochloride (DAPI) were used for nuclear counterstaining. STAT5a, STAT5b, PY-STAT5 (Cell Signaling) and Ki67 (Daka) were examined in paraffin embedded intestinal sections using VECTASTAIN Elite ABC system (Vector lab, Burlingame, CA). The mRNA levels of *Olfm4*

(plasmid clone: 4163833) and *Ascl2* (plasmid clone: 1078130) in intestinal crypts were determined with *In Situ* hybridization (Gregorieff and Clevers, 2010). BrdU staining followed manufacturer's instructions (BrdU *in situ* Detection Kit, BD Pharmingen) (Gilbert et al., 2012). EdU staining was done with Imaging Kits. Apoptotic IECs were detected with *in situ* apoptotic labelling kit and results were expressed as TUNEL-positive IECs per regenerated crypts (Han et al., 2009). Images were captured using a Zeiss microscope and Axioviewer image analysis software (Carl Zeiss Corp, Germany).

**Flow Cytometry (FACS).** LGR5 FACS analysis was performed by using isolated ileal epithelia from *Lgr5CreER* and *VilCreER;Lgr5CreER;Stat5<sup>ff</sup>* mice. IECs were extracted with 2 mM EDTA and manual shaking, followed by cell strainer filter to generate a single-cell suspension. Singlet discrimination was sequentially performed by using plots for FSC (FSC-A vs. FSC-H) and SSC (SSC-W vs. SSC-H). Dead cells were excluded by scatter characteristics and 7-AAD staining. LGR5<sup>+</sup> IESCs were identified by their endogenous GFP expression, and EdU<sup>+</sup> proliferation was measured with Click-iT® FACS kit. All FACS experiments were performed on an LSR II flow Cytometer (BD Biosciences) at the CCHMC FACS Facility, and FACS data were analyzed by using FlowJo software (Tree Star, OR) (Gilbert et al., 2012; Yan et al., 2012).

**Laser Capture Microdissection (LCM).** Briefly, approximately 200 crypts at the very bottom of ileum from 0 position to +4 or +6 were captured by a Veritas Microdissection System (Life Technologies); RNA was isolated with a PicoPure RNA Isolation kit (Arcturus, Life Technologies) using published methods (Gilbert et al., 2012). The quality and concentration of RNA were measured by NanoDrop (Thermo Fisher, Waltham, MA). Total RNA (200 ng) was used to reversely transcribe to cDNA followed by a SYBR Green real-time PCR on the Mx4000 multiplex quantitative PCR instrument (Stratagene, La Jolla, CA).



**Chromatin Immunoprecipitation (ChIP) Assay and Quantitative Real-Time PCR (qPCR).**

ChIP assay with sub-confluent Caco-2 cells was performed using the EZ-ChIP kit according to the manufacturer's protocol (Upstate Biotechnology). Briefly, cell lysates were extracted from sub-confluent Caco-2 cells ( $5 \times 10^5$  cells/ml), and anti-STAT5a or STAT5 (sc-1081 or sc-835, Santa Cruz) was used for chromatin immunoprecipitation. The chromatin precipitates were used as a template for qPCR. The STAT5 binding sites in human *BMI1* promoter and primer sequences are listed in the Supplemental Table 1.

Ileal crypts were isolated from Tam-icS5 and Tam-RsCreER;icS5 mice (Spence et al., 2011). Dynabeads Protein G, mouse IgG and anti-FLAG were used to immunoprecipitate the sheered chromatin complexes. The chromatin precipitates from IgG, 1/10 input and anti-FLAG were amplified by qPCR to analyze the STAT5 binding sites in mouse *Bmi1* promoter. STAT5 binding sites and primer sequences specific for the STAT5 binding sites are listed in the Supplemental Table 2.

qPCR was performed by using the Brilliant II SYBR Green PCR Master Mix (Stratagene) as described earlier (Gilbert et al., 2012). Recovery of genomic DNA as a percentage input was calculated as the ratio of copy numbers in the precipitated immune complexes to the input control.

Total RNA was extracted from mouse tissues or cultured enteroids using RNeasy Mini Kit (QIAGEN, Valencia, CA) according to the manufacturer's protocol. PCR reactions were performed with SYBR Green QPCR mix in the Mx3000p thermocycler (Stratagene) (Gilbert et al., 2012). The primer sequences (Aguilera et al., 2011; Gilbert et al., 2012; Yui et al., 2012) are listed in the Supplemental Table 3.

**Human embryonic stem cell (hESC) maintenance, Lentiviral transduction of ES cells and IEC lines.**

Federally-approved WA01 (H1) hESCs were maintained in mTeSR1 media as colonies using human hESC-qualified matrigel (BD Biosciences) and passaged with 1 mg/mL dispase (Life Technologies) every 4 days. Details were described as published (McCracken et al., 2011). The plasmids (pMSCV-STAT5a-ER\* or pMSCV-icS5-ER\*) (Figure S6A) (Grebien et al., 2008) were cloned into pLENTI-PGK-Puro-DEST plasmids (Addgene, Cambridge, MA) using pENTR/D-TOPO cloning kit. STAT5a-ER\* or icS5-ER\* inserts were then transferred from the entry clone to the destination lentiviral plasmid pLENTI-PGK-Puro-DEST (w529-2) using lambda reverse standard recombination. The resulting lentiviral plasmids were designated: Lenti PGK Puro-STAT5a-ER\* or icS5-ER\*. Sub-confluent Caco-2 cells (under 25% confluency) or ES cells were respectively co-transfected with the above lentiviral plasmids combined with psPAX2 and pMD2 (Addgene, Cambridge, MA). Expression of IESC marker (LGR5) was determined with immunoblotting and PCR after STAT5 activation was induced by 4HT.

**Generation of transgenic mice with inducible expression of a gain of function *Stat5* variant.**

Firstly, plasmid construct targeting the icS5 (icS5-FLAG-IRES-hCD2) was generated. The 3' and 5' homologous arm (HA) with LoxP sites were amplified from BAC RP23-362J7, and icS5 gene with FLAG tag was also amplified by PCR from the pMSCV-icS5 plasmid. The 'IRES-hCD2t-SV40polyA-FRT-Kan-FRT' cassette was cloned from the pQS-CD19-hCD2t plasmid (Delogu et al., 2006). The entire construct was assembled in the pQS1 plasmid (Figure S4A). The orientation of the HA sequences was designed such that the recombined BAC contains the icS5 sequence in the anti-sense 'off' orientation. icS5-FLAG-IRES-hCD2 was then cloned into the retroviral pMSCV backbone to transfect NIH-3T3 cells or 293T cells. hCD2 expression was

detected by FACS, and the DNA binding ability of icS5 was determined by Electrophoretic Mobility Shift Assay (EMSA).

Secondly, ET recombination into BAC RP23-362J7 was performed as published (Muyrers et al., 1999). The kanamycin resistance cassette was excised by electroporation of bacterial cells containing the BAC with the 705-Flp plasmid. The final BAC harbors the icS5-FLAG-IRES-hCD2 construct, flanked by LoxP sites, in an antisense orientation within the endogenous *Stat5a* locus. The HAs allow specific recombination of the BAC, where in the start codon of the first exon of *Stat5a* was replaced by the construct. This allows expression of the icS5 construct under the regulation of the endogenous promoter upon Cre recombination (Figure 4A). The final BAC construct was confirmed by two independent Southern blots (Figure S4B). The BAC also contains the entire wild type murine *Stat5b* locus, and only 3' region of the *Stat3* locus that lacks the promoter, ATG START codon, KOZAK sequence, etc. Therefore, only STAT5 is expressed from this BAC since the 5' regulatory regions of *Stat3* locus are missing.

Thirdly, icS5 transgenic mice were generated. Briefly, the BAC construct was linearized with NotI restriction digestion and purified. 1-2 ng of the purified, linearized transgene was injected into the male pro-nuclei of fertilized eggs from C57BL/6N mice. Embryos were implanted into pseudo-pregnant females. Transgenic pups were genotyped before they were weaned (Figure S4C). Two copies of the BAC integration were confirmed by Southern blot in the transgenic mice (Figure S4D).

Finally, the mice with inducible activation of STAT5 were generated by crossing icS5 with *Rosa26-CreER*<sup>T2</sup> mice (*RsCreER*;icS5). Activation of STAT5 was induced by Cre-LoxP recombination, which allows the expression of icS5 upon Tam induction (Hameyer et al., 2007) (Figure 4A, and Figure S4E and 4F).

## Supplemental References

- Aguilera, C., Nakagawa, K., Sancho, R., Chakraborty, A., Hendrich, B., and Behrens, A. (2011). c-Jun N-terminal phosphorylation antagonises recruitment of the Mbd3/NuRD repressor complex. *Nature* *469*, 231-235.
- Akpolat, M., Kanter, M., and Uzal, M.C. (2009). Protective effects of curcumin against gamma radiation-induced ileal mucosal damage. *Archives of toxicology* *83*, 609-617.
- Barker, N., van Es, J.H., Kuipers, J., Kujala, P., van den Born, M., Cozijnsen, M., Haegebarth, A., Korving, J., Begthel, H., Peters, P.J., *et al.* (2007). Identification of stem cells in small intestine and colon by marker gene *Lgr5*. *Nature* *449*, 1003-1007.
- Cui, Y., Riedlinger, G., Miyoshi, K., Tang, W., Li, C., Deng, C.X., Robinson, G.W., and Hennighausen, L. (2004). Inactivation of Stat5 in mouse mammary epithelium during pregnancy reveals distinct functions in cell proliferation, survival, and differentiation. *Molecular and cellular biology* *24*, 8037-8047.
- Delogu, A., Schebesta, A., Sun, Q., Aschenbrenner, K., Perlot, T., and Busslinger, M. (2006). Gene repression by Pax5 in B cells is essential for blood cell homeostasis and is reversed in plasma cells. *Immunity* *24*, 269-281.
- el Marjou, F., Janssen, K.P., Chang, B.H., Li, M., Hindie, V., Chan, L., Louvard, D., Chambon, P., Metzger, D., and Robine, S. (2004). Tissue-specific and inducible Cre-mediated recombination in the gut epithelium. *Genesis* *39*, 186-193.
- Gilbert, S., Zhang, R., Denson, L., Moriggl, R., Steinbrecher, K., Shroyer, N., Lin, J., and Han, X. (2012). Enterocyte STAT5 promotes mucosal wound healing via suppression of myosin light chain kinase-mediated loss of barrier function and inflammation. *EMBO Mol Med*,2012;4(2):109-24.
- Grebien, F., Kerenyi, M.A., Kovacic, B., Kolbe, T., Becker, V., Dolznig, H., Pfeffer, K., Klingmuller, U., Muller, M., Beug, H., *et al.* (2008). Stat5 activation enables erythropoiesis in the absence of EpoR and Jak2. *Blood* *111*, 4511-4522.
- Gregorieff, A., and Clevers, H. (2010). In situ hybridization to identify gut stem cells. *Current protocols in stem cell biology Chapter 2*, Unit 2F 1.
- Hameyer, D., Loonstra, A., Eshkind, L., Schmitt, S., Antunes, C., Groen, A., Bindels, E., Jonkers, J., Krimpenfort, P., Meuwissen, R., *et al.* (2007). Toxicity of ligand-dependent Cre recombinases and generation of a conditional Cre deleter mouse allowing mosaic recombination in peripheral tissues. *Physiological genomics* *31*, 32-41.
- Han, X., Gilbert, S., Groschwitz, K., Hogan, S., Jurickova, I., Trapnell, B., Samson, C., and Gully, J. (2010). Loss of GM-CSF signalling in non-haematopoietic cells increases NSAID ileal injury. *Gut* *59*, 1066-1078.
- Han, X., Ren, X., Jurickova, I., Groschwitz, K., Pasternak, B.A., Xu, H., Wilson, T.A., Hogan, S.P., and Denson, L.A. (2009). Regulation of intestinal barrier function by signal transducer and activator of transcription 5b. *Gut* *58*, 49-58.
- Hua, G., Thin, T.H., Feldman, R., Haimovitz-Friedman, A., Clevers, H., Fuks, Z., and Kolesnick, R. (2012). Crypt base columnar stem cells in small intestines of mice are radioresistant. *Gastroenterology* *143*, 1266-1276.
- Kim, T.H., Escudero, S., and Shivdasani, R.A. (2012). Intact function of *Lgr5* receptor-expressing intestinal stem cells in the absence of Paneth cells. *Proceedings of the National Academy of Sciences of the United States of America* *109*, 3932-3937.
- McCracken, K.W., Howell, J.C., Wells, J.M., and Spence, J.R. (2011). Generating human intestinal tissue from pluripotent stem cells in vitro. *Nat Protoc* *6*, 1920-1928.
- Melendez, J., Liu, M., Sampson, L., Akunuru, S., Han, X., Vallance, J., Witte, D., Shroyer, N., and Zheng, Y. (2013). Cdc42 coordinates proliferation, polarity, migration, and differentiation of small intestinal epithelial cells in mice. *Gastroenterology* *145*, 808-819.
- Munoz, J., Stange, D.E., Schepers, A.G., van de Wetering, M., Koo, B.K., Itzkovitz, S., Volckmann, R., Kung, K.S., Koster, J., Radulescu, S., *et al.* (2012). The *Lgr5* intestinal stem cell signature: robust expression of proposed quiescent '+4' cell markers. *The EMBO journal* *31*, 3079-3091.



- Muyrers, J.P., Zhang, Y., Testa, G., and Stewart, A.F. (1999). Rapid modification of bacterial artificial chromosomes by ET-recombination. *Nucleic acids research* 27, 1555-1557.
- Sato, T., Vries, R.G., Snippert, H.J., van de Wetering, M., Barker, N., Stange, D.E., van Es, J.H., Abo, A., Kujala, P., Peters, P.J., *et al.* (2009). Single Lgr5 stem cells build crypt-villus structures in vitro without a mesenchymal niche. *Nature* 459, 262-265.
- Spence, J.R., Mayhew, C.N., Rankin, S.A., Kuhar, M.F., Vallance, J.E., Tolle, K., Hoskins, E.E., Kalinichenko, V.V., Wells, S.I., Zorn, A.M., *et al.* (2011). Directed differentiation of human pluripotent stem cells into intestinal tissue in vitro. *Nature*,2011;470(7332):105-9.
- Wong, V.W., Stange, D.E., Page, M.E., Buczacki, S., Wabik, A., Itami, S., van de Wetering, M., Poulsom, R., Wright, N.A., Trotter, M.W., *et al.* (2012). Lrig1 controls intestinal stem-cell homeostasis by negative regulation of ErbB signalling. *Nature cell biology* 14, 401-408.
- Yan, K.S., Chia, L.A., Li, X., Ootani, A., Su, J., Lee, J.Y., Su, N., Luo, Y., Heilshorn, S.C., Amieva, M.R., *et al.* (2012). The intestinal stem cell markers Bmi1 and Lgr5 identify two functionally distinct populations. *Proceedings of the National Academy of Sciences of the United States of America* 109, 466-471.
- Yui, S., Nakamura, T., Sato, T., Nemoto, Y., Mizutani, T., Zheng, X., Ichinose, S., Nagaishi, T., Okamoto, R., Tsuchiya, K., *et al.* (2012). Functional engraftment of colon epithelium expanded in vitro from a single adult Lgr5(+) stem cell. *Nature medicine*,2011 Sep;32(26):6342-50.
